1 **Rad21l1 cohesin subunit is dispensable for spermatogenesis but not**  
2 **oogenesis in zebrafish**

3

4 Yana P. Blokhina<sup>1,2,¶</sup>, Michelle Frees<sup>1,¶</sup>, An Nguyen<sup>1,¶</sup>, Masuda Sharifi<sup>1,3</sup>, Daniel B.  
5 Chu<sup>1,2</sup>, Bruce W. Draper<sup>1</sup>, Sean M. Burgess<sup>1\*</sup>

6

7

8 <sup>1</sup> Department of Molecular and Cellular Biology, University of California, Davis,  
9 California, United States of America

10

11 <sup>2</sup> Integrative Genetics and Genomics Graduate Group, University of California, Davis,  
12 United States of America

13

14 <sup>3</sup> Biochemistry, Molecular, Cellular, and Developmental Biology Graduate Group,  
15 University of California, Davis, United States of America

16

17

18 \* Corresponding author

19 Email: [smburgess@ucdavis.edu](mailto:smburgess@ucdavis.edu)

20

21

22 ¶ These authors contributed equally to this work.

23

## 24 **Abstract**

25           Meiosis produces haploid gametes that will give rise to the next diploid  
26 generation. Chromosome segregation errors occurring at one or both meiotic divisions  
27 result in aneuploidy, which can lead to miscarriages or birth defects in humans. During  
28 meiosis I, ring-shaped cohesin complexes play important roles to aid in the proper  
29 segregation of homologous chromosomes. While REC8 is a specialized meiosis-  
30 specific cohesin that functions to hold sister chromatids together, the role of its  
31 vertebrate-specific paralog, RAD21L, is poorly understood. Here we tested if Rad2111,  
32 the zebrafish homolog of human and mouse RAD21L, is required for meiotic  
33 chromosome dynamics during oogenesis and spermatogenesis. We found that Rad2111  
34 is an abundant component of meiotic chromosomes where it localizes to both the  
35 chromosome axes and the transverse filament of the synaptonemal complex (SC).  
36 Knocking out *rad2111* causes nearly the entire mutant population to develop as fertile  
37 males, suggesting the mutation triggers a sex reversal from female to male due to a  
38 failure in oocyte production. The *rad2111*<sup>-/-</sup> mutant males display normal fertility at sexual  
39 maturity. Sex reversal was partially suppressed in the absence of *tp53*, suggesting that  
40 the *rad2111*<sup>-/-</sup> mutation causes defects leading to a Tp53 dependent response,  
41 specifically in females. The *rad2111*<sup>-/-</sup>;*tp53*<sup>-/-</sup> double mutant females produced elevated  
42 rates of decomposing eggs and deformed offspring compared to *tp53*<sup>-/-</sup> controls. This  
43 response, however, is not linked to a defect in repairing Spo11-induced double-strand  
44 breaks since deletion of Spo11 does not suppress the sex reversal phenotype. Overall,  
45 our data highlight an exceptional sexually dimorphic phenotype caused by knocking out

46 a meiotic-specific cohesin subunit. We propose that Rad2111 is required for maintaining  
47 the integrity of meiotic chromatin architecture during oogenesis.

48

## 49 **Author Summary**

50 A prominent symptom of age-linked reproductive decline in women is the  
51 increased rate of miscarriage and birth defects due to aneuploidy. Aneuploidy can arise  
52 when chromosomes fail to segregate properly during meiosis, the process of creating  
53 haploid gametes from a diploid germ cell. Oocyte progression normally arrests prior to  
54 anaphase I, after homologous chromosomes have formed crossovers, but before  
55 ovulation, which triggers the first round of segregation. This prolonged arrest makes  
56 oocytes especially vulnerable to degradation of meiotic chromosome structure and  
57 homolog connections over time. Cohesin complexes play a major role in maintaining the  
58 meiotic chromosome architecture. Here we assess the role of the vertebrate-specific  
59 Rad2111 cohesin subunit in zebrafish. We find that while males appear mostly  
60 unaffected by loss of Rad2111, oocyte production is massively compromised, leading to  
61 sex reversion to males. Sex reversion can be partially prevented in the absence of  
62 Tp53, demonstrating that loss of Rad2111 leads to a Tp53-dependent response in  
63 oocytes. Strikingly, double mutant *rad2111 tp53* females produce large numbers of poor  
64 quality eggs and malformed offspring. This demonstrates a cohesin-linked vulnerability  
65 in female meiosis not present in males and sheds light on a potential mechanism  
66 associated with the decline in female reproductive health.

67

68

## 69 **Introduction**

70           Meiosis is the cellular process that forms haploid gametes and drives the  
71 inheritance of chromosomes from one generation to the next. Two rounds of  
72 chromosome segregation following one round of DNA replication function to deposit the  
73 correct number of chromosomes in each gamete. Errors in this process can result in  
74 aneuploidy, a leading cause of birth defects and miscarriages in women. The majority of  
75 these errors occur during oogenesis. As women age, the incidence of pregnancies with  
76 trisomic and monosomic embryos may exceed 50% [1,2]. The cellular mechanisms that  
77 lead to aneuploidy in oocytes are poorly understood, yet several lines of evidence point  
78 to the premature degradation of cohesin complexes with age [3–8].

79           Cohesins are multi-subunit ring-like complexes that link two double-stranded  
80 DNA (dsDNA) strands together [9–11]. The complexes are composed of two SMC  
81 proteins (structural maintenance of chromatin), which interact to form the ring, and a  
82 kleisin subunit that functions to close the ring [12]. Combinations of different SMC and  
83 kleisin paralogs carry out a number of cellular functions, one of which is to maintain  
84 connections between sister chromatids during meiosis [13–17]. Sister chromatid  
85 cohesion, in combination with at least one crossover between homologous  
86 chromosomes, is essential to keep homologous chromosomes physically linked until  
87 they separate at anaphase I [15,18–21].

88           REC8 and RAD21L are two meiosis-specific kleisin subunits [12]. REC8 plays  
89 critical roles in forming and maintaining the unique chromosome architecture that  
90 supports the pairing, synapsis, and crossing over between homologous chromosomes  
91 and is conserved from yeast, plants, worms, flies, to mammals [13–15,18,21–30]. By

92 contrast, RAD21L is only found in vertebrates. Several studies have linked RAD21L to a  
93 role in establishing interactions between homologous chromosomes in mouse  
94 spermatocytes [31–36]. The loss of *Rad21l* in mouse leads to infertility in the male, and  
95 age-dependent sterility in the female [32]. Understanding the role RAD21L plays in  
96 meiotic chromosome dynamics, however, has been elusive due to functional  
97 redundancy seen during the analysis of mutant phenotypes in mouse [37]. Although  
98 homologs of RAD21L have been identified in other vertebrate genomes, there is a  
99 dearth of studies of this cohesin in vertebrates other than mouse.

100 Zebrafish has emerged as an excellent model to use genetic approaches to  
101 study the chromosome events in meiosis [38–41]. Both sexes produce gametes  
102 throughout their lives, thus providing a window to study sexually dimorphic features of  
103 female and male meiosis. Importantly, hundreds of eggs from individual animals can be  
104 analyzed in a single cross, which provides a quantitative measure of gamete quality.  
105 The development of progeny is easily assessed, since embryos are transparent and  
106 develop outside the body. Lab strains of zebrafish do not have a heterogametic sex with  
107 unpaired or partially paired sex chromosomes as seen in many other vertebrate  
108 species. This bypasses some of the potentially confounding effects of disrupting meiotic  
109 sex chromosome inactivation (MSCI) that can lead to prophase arrest when homolog  
110 pairing is compromised [42,43]. For example, the prophase arrest phenotype seen in  
111 male *Rad21l1* mutant mice has been attributed to the unpaired X-Y sex body  
112 [31,32,37,44].

113 *Rad21l1* is the zebrafish homolog of mouse and human *Rad21L*. The aim of this  
114 study is to use zebrafish as a novel model vertebrate organism to study sex-specific

115 roles of Rad2111. We show that Rad2111 plays a role in oogenesis yet is dispensable for  
116 spermatogenesis. Moreover, deletion of *rad2111* activates a Tp53-mediated response in  
117 females that does not require the formation of Spo11-dependent double strand breaks.  
118 We propose that Rad2111 functions at a critical step of oogenesis that may provide  
119 insight into errors that lead to increased birth defects and miscarriage.

120

## 121 **Results**

122 Mouse *Rad21L* and zebrafish *rad2111* were identified in silico as a kleisin subunit of  
123 cohesin by sequence homology to mouse and human *Rad21* and *Rec8* paralogs  
124 [31,45]. To determine if zebrafish Rad2111 protein is a component of axial elements  
125 (AE), lateral elements (LE), and/or the transverse filament (TF) of the synaptonemal  
126 complex in zebrafish, we created an antibody to the C-terminus region of Rad2111  
127 (amino acids 329-516) (S Fig 1). Using this antibody, we stained nuclear surface spread  
128 spermatocytes and oocytes using immunofluorescence (IF) detection by 3D-structured  
129 illumination microscopy (Fig 1). Previously, we and others showed that the AE protein  
130 Sycp3 loads at leptotene near telomeres clustered in the bouquet to form short lines.  
131 Shortly thereafter, the axes elongate toward the middle of the chromosome during  
132 zygotene until they reach full length at early pachytene [38–41]. Synapsis, as detected  
133 by IF staining of the transverse filament protein Sycp1, initiates near the chromosome  
134 ends and extends inward, slightly trailing the elongation of the AE until pachytene  
135 [39,40]. We found that Rad2111 foci are dispersed throughout the spread region in  
136 leptotene and zygotene yet are concentrated along the unpaired nascent Sycp3 axial  
137 elements (Fig 1A [a-h]). At early zygotene, Rad2111 continues to load on unpaired AE

138 as they elongate, yet as chromosome regions synapse, Rad2111 is also found between  
139 axes and colocalizes with Sycp1 (Fig 1A [m-p]). By late zygotene and pachytene, the  
140 dispersed foci largely disappear and nearly all Rad2111 protein is found along and  
141 between synapsed axes (Fig 1A [q-t]). Similar staining pattern is seen in females (Fig  
142 1B). This localization is similar to that described in a recent study using a different  
143 antibody to zebrafish Rad2111 [41]. Localization to axes and the transverse filament of  
144 the SC is also similar to the localization of RAD21L protein in mouse as viewed by  
145 super-resolution microscopy [46]. These results show that zebrafish Rad2111 is an  
146 abundant protein associated with meiotic chromosome architecture starting at leptotene.

147

#### 148 **Creating the *rad2111* mutant**

149 We created a *rad2111* mutant to assess the meiotic function of this cohesin  
150 subunit in zebrafish. The *rad2111* gene in zebrafish consists of 14 exons encoding a  
151 546-amino acid (aa) protein product (NCBI Reference Sequence: NP\_001073519.1).  
152 We used TALENs targeted to the second exon to introduce an indel mutation by error  
153 prone repair, which we designated as the mutant allele *rad2111<sup>uc89</sup>*. Sequencing of  
154 genomic DNA isolated from offspring of founder lines identified a 17 base pair deletion  
155 that resulted in a frameshift mutation in the coding region that predicts a truncated  
156 protein of 27aa (Fig 2A). To confirm disruption of Rad2111 expression, we probed  
157 spermatocyte nuclear surface spreads from *rad2111<sup>-/-</sup>* mutants with the anti-Rad2111  
158 antibody and found that Rad2111 was absent (Fig 2B). From this we conclude that  
159 *rad2111<sup>uc89</sup>* is a null allele (hereafter referred to as *rad2111<sup>-/-</sup>*).

160

161 ***rad2111* mutants are predominantly male due to late female to male sex reversion**

162 All zebrafish start out with a bipotential gonad that differentiates into an ovary or  
163 testis based on a combination of genetic and environmental factors [47–51]. The sex of  
164 the gonad is determined by the quantity of oocytes produced during the bipotential  
165 phase; females will develop when there are sufficient numbers of oocytes to support  
166 ovarian development. In wild-type strains, oocytes in the gonads of presumptive males  
167 will begin to apoptose around 20 days post fertilization (dpf) to prepare for testis  
168 development, whereas oocytes in the gonads of presumptive females will continue to  
169 mature [52,53]. Continued oogenesis is required for zebrafish to maintain the female  
170 state; mutants that affect the production of oocytes results in female to male sex  
171 reversion [54–56]. We assessed the sex ratio of adult *rad2111*<sup>-/-</sup> homozygous mutants  
172 (n=126), based on protruding belly and morphology of the genital papilla, and found only  
173 two females (1.6%), while wild type (n=108) and heterozygous (n=165) fish showed sex  
174 ratios within the normal range (40.7% and 50.3% females, respectively; Fig  
175 2C). Interestingly, the two *rad2111*<sup>-/-</sup> females were able to reproduce and generate  
176 healthy offspring, indicating that the sex-reversal phenotype associated with loss of  
177 *rad2111* displays incomplete penetrance. Since sex is determined by both genetic and  
178 environmental conditions, it is not known if this failure to sex revert is due to one or the  
179 other, or both.

180 The overabundance of males in the adult mutant population suggests that the  
181 *rad2111*<sup>-/-</sup> mutation may be affecting oogenesis. A precedence for this phenotype is seen  
182 in *fancl* and *brca2* mutants where the gonads never form mature oocytes and most  
183 animals develop as males [54,55]. To test if *rad2111*<sup>-/-</sup> mutants can form oocytes, we



184 analyzed gonad sections of 12 animals that were wild-type or heterozygous, and 11  
185 knockout animals at 35-36 dpf stained with DAPI and antibodies to Ddx4, a germ-cell  
186 marker also known as Vasa. Here we saw no significant difference in the number of  
187 *rad2111* positive (*rad2111*<sup>+/+</sup> or *rad2111*<sup>+/-</sup>) compared to knockout animals with oocytes,  
188 suggesting that oogenesis in the *rad2111*<sup>-/-</sup> mutant can progress through early stages of  
189 meiotic prophase (Fig 2D).

190 To determine the time window at which *rad2111*<sup>-/-</sup> mutants differentiate as males,  
191 we examined gonads of wild-type and *rad2111*<sup>-/-</sup> animals at 40 and 45 days stained with  
192 DAPI and Ddx4. At both time points, wild-type samples could be easily identified as  
193 either female or male. That is, 11/21 gonads had oocytes at 40 dpf, and 7/9 gonads had  
194 oocytes at 45 dpf (Fig 3E). By contrast, at both 40 and 45 days, the majority of the  
195 mutant gonads contained no oocytes (18/19 and 9/10, respectively), indicating a  
196 significant decline in oocyte progression in the mutants compared to wild type ( $p < 0.01$ ,  
197 Fisher's exact test). In contrast to their wild type tank-mates at 40 and 45 dpf where the  
198 gonads already committed to a male or female fate, the mutants exhibited a broad  
199 distribution of gonad morphologies, ranging from i) having early stage oocytes, ii)  
200 resembling wild-type males, and iii) having primarily premeiotic germ cells (Fig 3E).  
201 Since the latter class was not seen among the 35-36 dpf mutants, our interpretation is  
202 that this class of gonads represent a delay in testis development following sex reversion  
203 (see below). Together, these data suggest that a portion of the *rad2111*<sup>-/-</sup> males are the  
204 product of female to male sex reversion. Notably, in the two cases where oocytes were  
205 seen in a mutant gonad, the DAPI signal shows oocytes of different stages of

206 differentiation past pachytene and even up to lampbrush stage where cells have  
207 entered diplotene stage (Fig 3E) [57].

208

### 209 **Rad2111 is dispensable for male fertility**

210 ***rad2111* mutant males produce healthy offspring.** To test if the mutant males are  
211 fertile, we set up individual crosses using one mutant male and one wild-type female per  
212 tank over the course of several weeks (5 crosses each of wild type and mutant males  
213 per attempt). While 12 of 14 individual mutant males crossed successfully at least one  
214 time, 2 males did not cross, even after three attempts. We next used the pool of 12  
215 fertile mutant males to assess if their progeny exhibit developmental defects. The eggs  
216 produced by these crosses were collected and categorized at 6 hours post fertilization  
217 (hpf) as either fertilized or unfertilized. There was no significant difference in the fertility  
218 of the mutant males compared to their wild-type tank mates (Fig 3A). All normal,  
219 fertilized embryos were further incubated at 30°C and observed at 24 and 48 hpf. No  
220 significant difference in the frequency of survival or the development of progeny of  
221 mutant and wild-type tank mates was observed (Fig 3B).

222

223 **Some *rad2111*<sup>-/-</sup> mutant males display unusual gonad morphology.** Adult *rad2111*<sup>-/-</sup>  
224 mutant males at 60+ dpf had largely normal-appearing gonads as seen by anti-Ddx4  
225 and DAPI staining of whole mounts, however, the exceptions suggest a depletion of  
226 early germ cells during development or delayed development of sex reverted males. Of  
227 11 mutant samples that were stained and imaged, 8 resembled wild-type, 2 had areas  
228 of sparse germ cells, and 1 contained no germ cells. One possibility is that mutants that

229 reverted to male especially late were unable to recover an appropriate number of  
230 spermatogonia during the late development of testes. Notably, even regions that are  
231 sparsely populated by germ cells in the mutant adult gonad have sperm, which supports  
232 our finding that the majority of mutant males are fertile (Fig 3C).

233

234 ***rad211*<sup>-/-</sup> mutant males are proficient for forming the bouquet as well as pairing**  
235 **and synapsis of homologous chromosomes.** In mice, *Rad211*<sup>-/-</sup> mutants show  
236 defects in telomere attachment to the nuclear envelope (Biswas, 2016). We tested if this  
237 was the case in zebrafish by staining mounted gonad sections from wild-type and  
238 *rad211*<sup>-/-</sup> animals with DAPI to detect DNA, a PNA probe to detect telomeres, and an  
239 antibody to  $\gamma$ H2AX to detect DSBs. In contrast to what was observed in mice, we found  
240 that telomere clustering and DSB localization in mutant sections were indistinguishable  
241 from wild type (Fig 3C). Additionally, by probing Sycp3 localization on nuclear surface  
242 spreads, we found that *rad211*<sup>-/-</sup> mutant males form 25 paired bivalents, indicating that  
243 Rad211 is not essential for these processes in the male (Fig 2B). Together these data  
244 suggest that Rad211 is dispensable for meiotic progression and fertility in zebrafish  
245 males. It is noteworthy that chromosomes in mutant male spreads seemed occasionally  
246 to be more fragmented or fragile to the physical forces of the spreading procedure and  
247 contained some internally asynapsed regions.

248

249 **The *rad211*<sup>-/-</sup>;*tp53*<sup>-/-</sup> double mutant partially rescues the sex ratio**

250 Previous studies analyzing *brca2* and *fancl* mutants demonstrated that the *tp53*  
251 mutation rescues the female to male sex reversal phenotype seen in these mutants,

252 possibly by inactivating a DNA damage checkpoint pathway [54,55]. In mouse  
253 spermatocytes, P53 participates in recombination dependent pachytene arrest [58]. To  
254 test if the loss of *tp53* could rescue the *rad2111*<sup>-/-</sup> sex reversal phenotype, we created a  
255 *rad2111*<sup>-/-</sup>; *tp53*<sup>-/-</sup> double mutant carrying a loss-of-function *tp53* missense mutation [59].  
256 To isolate this genotype, we incrossed double heterozygous *rad2111*<sup>+/-</sup>; *tp53*<sup>+/-</sup> mutants  
257 and sexed the resulting offspring. We found that while *rad2111*<sup>-/-</sup>; *tp53*<sup>+/+</sup> and *rad2111*<sup>-/-</sup>  
258 ; *tp53*<sup>+/-</sup> mutants produced only the rare female (1/27 and 0/63, respectively), 29% (8/28)  
259 of the *rad2111*<sup>-/-</sup>; *tp53*<sup>-/-</sup> double mutants developed as females (Fig 4A). These results  
260 suggest that deleting *rad2111* disrupts oogenesis by activating a Tp53 dependent  
261 checkpoint.

262

263 ***rad2111*<sup>-/-</sup>; *tp53*<sup>-/-</sup> double mutant females produce large numbers of decomposing**  
264 **eggs and deformed offspring**

265 With the *rad2111*<sup>-/-</sup>; *tp53*<sup>-/-</sup> female progeny generated from the double-  
266 heterozygous incross, we were able to evaluate the effect deleting *rad2111* has on  
267 oogenesis. If *rad2111* is dispensable in females, as it is in males, we expected that the  
268 double mutant mothers would be fertile and give rise to normal offspring. Alternatively, if  
269 the *rad2111*<sup>-/-</sup> mutation activates a tp53-dependent checkpoint due to errors at some  
270 step specific to oogenesis, we expected that the double mutant mothers would produce  
271 oocytes, albeit with decreased fertility. To distinguish between these two possibilities,  
272 we crossed *rad2111*<sup>-/-</sup>; *tp53*<sup>-/-</sup> females to wild-type males and assessed egg and embryo  
273 morphology compared to a *tp53*<sup>-/-</sup> single mutant control. The eggs produced by these  
274 crosses were collected and categorized at 6 hours post fertilization (hpf) as normal

275 (fertilized), unfertilized, or decomposing. Fertilized eggs are characterized as being  
276 nearly transparent, with a risen chorion and dividing cells. Unfertilized eggs are typically  
277 transparent without any signs of decomposition at 6 hpf. Any remaining eggs that had  
278 already begun to decompose or did not appear to be correctly formed with a risen  
279 chorion were categorized as decomposing.

280 First, we found that the double mutant females produced high numbers of  
281 decomposing eggs and had fewer viable embryos at 6 hpf compared to the *tp53*<sup>-/-</sup>  
282 control (Fig 4B-C). Many of the decomposing eggs from the double mutants had a more  
283 “opaque” appearance than regular decomposing eggs and did not have a lifted chorion  
284 (Fig 4D). This is reminiscent of a previously described phenotype where opaque eggs  
285 appeared to be oocytes that failed to progress past stage IV of oogenesis [60]. In  
286 addition, many of the eggs from double mutant females were smaller in size and had  
287 smaller chorions than normal (Fig 4D). Despite this smaller size, these eggs were  
288 considered normal if they fit the criteria described above for the *rad2111*<sup>-/-</sup> male crosses.  
289 We tracked the normal embryos to 24 hpf and 48 hpf (Fig 4E). While the majority of  
290 embryos developed normally, we found a spectrum of abnormalities, ranging from  
291 normal appearance, to almost a complete failure to develop, to severe head or tail  
292 truncations (Fig 4F). These findings suggest that the fertility of *rad2111*<sup>-/-</sup>;*tp53*<sup>-/-</sup> females  
293 is severely reduced compared to *tp53*<sup>-/-</sup> controls, with much of the defect arising from  
294 poor gamete quality (~ $\frac{2}{3}$ ), and to a lesser extent the formation of dead and malformed  
295 embryos.

296 Interestingly, in an independent set of crosses we recovered one double mutant  
297 female out of 7 that exhibited a normal reproductive phenotype. It is possible that this

298 animal would have developed as a female without sex reversion as was seen for the  
299 rare single mutant females (Fig 2C).

300

### 301 **Rad2111 and Spo11 likely function in different pathways to promote oogenesis**

302 Mammalian oocytes respond to defects in processing DSBs by arresting  
303 development and undergoing programmed cell death via a P53 dependent pathway  
304 [61,62]. P53 arrest-inducing mutations in the meiosis-specific DSB repair genes *Dmc1*  
305 and *Msh5* are suppressed by the elimination of DSBs by deleting *Spo11* [62]. In  
306 zebrafish, *spo11* mutants have normal sex ratios and females are fertile, yet give rise to  
307 malformed embryos [40,41,63]. We reasoned that if the *rad2111*<sup>-/-</sup> mutation was inducing  
308 meiotic arrest by preventing the repair of Spo11-induced DSBs, eliminating DSBs by  
309 deleting Spo11 would rescue the *rad2111*<sup>-/-</sup> sex reversal phenotype. This was not the  
310 case since all of the *rad2111*<sup>-/-</sup>;*spo11*<sup>-/-</sup> double mutants were male (n=17, Fig 5A). This  
311 outcome indicates that Spo11 and Rad2111 act in separate pathways to promote  
312 oogenesis. This is further supported by the non-epistatic phenotype of the double  
313 mutant as seen in Ddx4 stained whole mounts. The double mutants produce only males  
314 as seen in the *rad2111*<sup>-/-</sup> single mutant yet also fail to produce sperm, as seen in the  
315 *spo11*<sup>-/-</sup> single mutants (Fig 5B).

316

### 317 **Discussion**

318 The data shown here support three major conclusions. First, Rad2111 is an  
319 abundant protein associated with meiotic chromosomes, colocalizing with both the axis  
320 protein Sycp3 and the transverse element of the synaptonemal complex Sycp1.

321 Second, spermatogenesis proceeds normally in the absence of Rad2111 but oogenesis  
322 is dramatically affected, as evidenced by female to male sex reversion, poor gamete  
323 quality, and an increase in the number of malformed and dead embryos from *rad2111*<sup>-/-</sup>  
324 ;*tp53*<sup>-/-</sup> double mutant females. Third, the defect imposed by the *rad2111* mutation  
325 results in a Tp53 mediated response that is not seen in males. This response is not due  
326 to a failure to form or repair Spo11-induced DSBs. Interestingly, the *rad2111*<sup>-/-</sup> single  
327 mutant females and a *rad2111*<sup>-/-</sup>;*tp53*<sup>-/-</sup> double mutant female displayed normal  
328 reproduction, showing that the sex reversal and poor gamete quality phenotypes have  
329 reduced penetrance and variable expressivity. We propose that Rad2111 plays a role in  
330 establishing and/or maintaining cohesin integrity that is important for oogenesis but is  
331 dispensable in males, and that the loss of Rad2111 in zebrafish reveals an increased  
332 resiliency of spermatogenesis over oogenesis.

333 While Rad2111 protein is present on meiotic chromosomes in both males and  
334 females, the majority of mutant males were fertile and produced normal progeny. This is  
335 in stark contrast to the phenotype of *Rad21l* mutant mice, where defective synapsis  
336 leads to arrest at mid-prophase, resulting in azoospermia [31–35,37,45]. This difference  
337 could be due, in part, to partial functional redundancy of the meiotic kleisin subunits.  
338 While mice have one copy each of *Rec8* and *Rad21l*, zebrafish has two *rec8* paralogs,  
339 *rec8a* and *rec8b*, in addition to *rad2111*. It is possible that one or both of the *Rec8*  
340 paralogs, or even the mitotic cohesin Rad21, is sufficient to cover for the loss of  
341 Rad2111 in early meiosis in both male and female zebrafish. Some functional  
342 redundancy among meiosis-specific cohesins has also been seen in mice [37].

343           The sexually dimorphic phenotype of the *rad2111* mutant reveals that oogenesis  
344 is more affected by the absence of Rad2111 than spermatogenesis. The question then  
345 arises, what stage of oogenesis is sensitive to the absence of Rad2111? As in  
346 mammals, oogenesis in zebrafish arrests prior to the meiosis I division in the dictyate  
347 stage. During arrest, the size of individual oocytes undergoes significant expansion  
348 before they are released from the ovary [57]. The expansion includes decompaction of  
349 DNA to form lampbrush chromosomes [64]. Thus a time window exists during  
350 oogenesis, but not spermatogenesis, where the DNA and/or chromatin architecture may  
351 be more vulnerable to damage. In humans, errors in chromosome segregation are a  
352 major source of aneuploidy, and the prolonged dictyate arrest is associated with these  
353 errors [3,4].

354           The cause of sex reversion in the *rad2111* mutant is not entirely clear. Mutations  
355 that affect the repair of Spo11-induced DSBs in many organisms lead to check-point  
356 mediated arrest of prophase progression [65]. In mouse, the absence of P53 bypasses  
357 the pachytene arrest caused by unrepaired Spo11-induced DSBs [58]. If the *rad2111*  
358 mutation prevented the repair of Spo11-induced DSBs, we expected that deletion of  
359 *spo11* would also suppress sex reversion; however, this was not observed. Instead, the  
360 Tp53-mediated arrest phenotype exhibited by the *rad2111* mutant may arise from  
361 another trigger of the meiotic checkpoint network. One possible explanation is that the  
362 mutants experience unrepaired Spo11-independent DSBs. Such breaks could  
363 potentially arise from different sources: 1) Oocytes arrested at diplotene may be subject  
364 to late DSBs which cannot be efficiently repaired in the absence of Rad2111, or 2) The  
365 absence of Rad2111 may alter meiotic chromosome architecture that is specific to



366 female meiotic chromosomes in a way that makes them more susceptible to Spo11-  
367 independent DSBs.

368         As oocytes mature, chromosomes undergo significant decompaction, which  
369 could make the DNA more vulnerable to breakage. Rad2111 could be important for  
370 establishing the structural and/or spatial context in which spontaneous breaks are  
371 repaired during dictyate arrest. In mice, mutation or decreased expression of cohesin  
372 subunits confer increased sensitivity to DNA damage [12,66]. In *Drosophila* and yeast,  
373 cohesins have been shown to bind to sites of induced DSBs [67,68]. Alternatively, the  
374 absence of Rad2111 itself may increase the sensitivity of chromatin to breakage. For  
375 example, tethering DNA loops, involving either sister chromatids or homologous  
376 chromosomes could protect DNA from DSBs. In either case, Rad2111 may be  
377 dispensable for spermatogenesis where this sensitive stage of dictyate arrest does not  
378 occur.

379         *RAD21L* variants in humans have been linked to increased maternal  
380 nondisjunction of chromosome 21 through GWAS analysis [69], and in mouse a null  
381 mutation in *Rad21l* is linked to age-dependent oocyte depletion [32]. While the effect of  
382 mutating *Rad21l* in mouse is more severe in males, the nature of this arrest is  
383 multifaceted. That is, *Rad21l* mutants arrest at pachytene, likely due, in part, to  
384 disruption of the process of meiotic sex chromosome inactivation (MSCI) [32,42]. This is  
385 consistent with a single-nucleotide polymorphism in human *RAD21L* linked to  
386 azoospermia in Sertoli cell-only syndrome in males [70]. Arrest due to a defect in MSCI  
387 would be epistatic to a possible downstream phenotype associated with a *Rad21l*  
388 mutation in mouse (i.e. arising in diplotene cells), so determining a later role for *Rad21l*

389 during spermatogenesis remains elusive. Zebrafish, which lack heterogametic sex  
390 chromosomes [71], is an excellent model to directly compare sexually dimorphic  
391 phenotypes associated with mutations in meiotic genes in males and females since  
392 mutant phenotypes can be uncoupled from defects arising from MSCI. Here we show  
393 that a *rad211* knockout mutation in zebrafish has a much more severe defect in  
394 females compared to males, providing additional insight into the molecular basis of the  
395 maternal age effect.

396

## 397 **Materials and Methods**

### 398 **Ethics statement**

399 The UC Davis Institutional Animal Care and Use Committee (IACUC) has  
400 approved of this work under the protocol #20199; For noninvasive procedures (e.g. fin  
401 clips for genotyping), zebrafish were anesthetized using tricaine. Invasive surgical  
402 methods were performed on fish euthanized by submerging fish in ice water.

403

### 404 **Zebrafish strains**

405 Zebrafish husbandry was performed as previously described [72]. The wild type  
406 NHGRI strain was used in the production of the *rad211<sup>uc89</sup>* mutants. Fish used in  
407 experiments were outcrossed to the AB strain background 3-4 times. The *spo11<sup>-/-</sup>* strain  
408 is in the AB background and described in Blokhina 2019. The *tp53<sup>-/-</sup>* mutant is described  
409 in [59]. All test crosses were performed with wild type AB strain fish.

410

### 411 ***rad211<sup>-/-</sup>* mutant generation**

412           The *rad2111<sup>uc89</sup>* mutants were generated using transcription activator-like effector  
413 nucleases (TALENs) to target exon 2 and genotyped using high resolution melt analysis  
414 (HRMA). TALEN target sequences: NG-NI-NG-NH-HD-HD-HD-NI-NI-HD-NG-HD-NG-  
415 NG-HD-NI-HD-HD-half repeat NG and NH-HD-NH-NI-NH-HD-HD-NI-NH-NI-NG-NG-  
416 NG-NG-NH-NH-HD-NH-half repeat NI. Injected founder fish were raised to adulthood  
417 and outcrossed to wild type fish. The resulting offspring were screened for mutations in  
418 *rad2111* via HRMA and subsequent sequencing. HRMA primer sequences are: Fwd 5'-  
419 CGCCGAGACATGTTTTATGCC-3', Rev 5'-TCAAACACGTGGGCTTTGGT-3'. The  
420 HRMA was performed with 20X Eva Green dye (VWR, Radnor, PA, Catalog #89138-  
421 982) using a CFX-96 real time PCR machine and Precision Melt Analysis software  
422 (BioRad, Hercules, CA). Mutants were backcrossed to either AB or NHGRI strain. The  
423 sex reversal phenotype was specific to populations genotyped as *rad2111<sup>-/-</sup>* indicating  
424 that it is unlikely due to off-target effects. The phenotype correlation remained  
425 consistent through 5-6 crosses.

426

## 427 **Genotyping**

428           Mutant identification: Genomic DNA was extracted and samples were analyzed  
429 with HRMA [40]. Primers for *Rad2111* genotyping were the same as described in the  
430 *rad2111* mutant generation. Primers for *Spo11* were Fwd 5'-  
431 TCACAGCCAGGATGTTTTGA -3' and Rev 5'-CACCTGACATTGCAGCA-3' with an  
432 annealing temperature of 61° C. Primers for Tp53 were Fwd 5'-  
433 CTCCTGAGTCTCCAGAGTGATGA-3' and Rev 5'-ACTACATGTGCAATAGCAGCTGC-  
434 3'. Genomic DNA was extracted and samples were analyzed as described for *rad2111*

435 mutants except that the reaction was done in 2 mM MgCl<sub>2</sub> with an annealing  
436 temperature of 65° C. Two HRMA runs were required to confirm the three genotypes  
437 resulting from a *tp53*<sup>+/-</sup> incross; the first run distinguished heterozygous from  
438 homozygous samples. Homozygous samples were run again under the same conditions  
439 but spiked with wild-type DNA in order to differentiate wild-type and mutant samples.

440

#### 441 **Antibody generation**

442 Guinea pig anti-zebrafish Rad2111 polyclonal antibody production: An N-terminal  
443 fragment of Rad2111 cDNA was amplified with Phusion DNA polymerase (Thermo  
444 Fisher Scientific, Catalog #: M0530L) using the following primers: Fwd 5'-  
445 aactttaagaaggagatataccatgTCAAGCTTTTGCCTTCCTGT-3' and Rev 5'-  
446 tctcagtggtggtggtggtggtgctcAAGCATGCAGAAAATAAGGCT-3'. The Rad2111 PCR  
447 product was then cloned into pET28b using NEBuilder HiFi DNA Assembly Master Mix  
448 (NEB, Catalog #: E5520S). BL21 (DE3) cells containing pRARE and Rad2111  
449 overexpression construct were grown in 2.6 L of LB with kanamycin and  
450 chloramphenicol until an OD<sub>600</sub> = 1 and induced with a final concentration of 1 mM  
451 IPTG at room temperature for six hours. The Rad2111 peptide was purified under  
452 denaturing conditions using Novagen NiNTA purification resins (Sigma, Catalog #:  
453 70666) according to the manufacturer's instructions. The Rad2111 peptide was  
454 concentrated to a final concentration of 1 mg/ml in PBS using a 10 kDa centrifugal filter  
455 (Sigma, Catalog # UFC901008). The Rad2111-derived peptide was injected into three  
456 guinea pigs by Pocono Rabbit Farm and Laboratory following the 91-day polyclonal  
457 antibody production protocol.

458

## 459 **Chromosome spreads and staining**

460 All chromosome spreads and staining were performed as previously described  
461 [40,73]. Antibodies and dilutions described in S1 Table.

462

## 463 **Adult testis section and whole mount preparation and staining**

464 Protocols including “whole mount testes staining “ and “testes section preparation  
465 and staining” were performed as previously described [40]. Antibodies and dilutions  
466 described in S1 Table.

467

## 468 **Whole mount juvenile gonad staining**

469 Juvenile gonad staining was performed similarly to the adult protocol with some  
470 modifications:

471 **Dissection and fixation:** Euthanized fish were decapitated and cut open along the  
472 ventral midline to expose the body cavity. Alternatively, an additional cut was made at  
473 the anal fin to expose body cavity if fish was too small to make a ventral cut. The fish  
474 were fixed in 4% PFA in PBT at 4° C for 16-18 hours with gentle rocking. The fish were  
475 placed into fresh tubes and washed in 0.2% PBT 3 times for a minimum of 5 minutes  
476 each. Gonads were dissected out in PBT and placed into a ceramic 12-well plate, 1  
477 gonad per well.

478 **Primary antibody staining:** Gonads were washed in an antibody block composed of  
479 5% goat serum and 5% BSA in 0.2% PBT for 1 hour minimum on a 2D rocker at room

480 temperature. Primary antibody chicken anti-Ddx4 [40] was added at 1:500 final dilution.

481 Plate was left rocking gently overnight at 4° C.

482 **Secondary antibody staining:** The gonads were washed 3 times for a minimum of 30

483 minutes in PBT, then washed in antibody block as described above. Secondary

484 antibody anti-chicken Alexa Fluor 488 was added at 1:300 final dilution. Plate was left

485 rocking gently overnight at 4° C.

486 **Glycerol dehydration and mounting:** The gonads were washed 2 times for a

487 minimum of 10 minutes each and dehydrated in a series of glycerol (Sigma-Aldrich,

488 Catalog #: G5516-1L) washes for 1 hour minimum each: 30% glycerol with DAPI at

489 1:5000 dilution in PBT, 50% glycerol with DAPI at 1:5000 dilution in PBT, and 70%

490 glycerol in PBT without DAPI. The gonads were mounted in 70% glycerol without DAPI

491 on slides with vacuum grease applied to the four corners to hold the coverslip in place.

492 Slides were stored at 4° C until imaging.

493

## 494 **Imaging**

495 All images were collected at the Department of Molecular and Cellular Biology

496 Light Microscopy Imaging Facility at UC Davis. Chromosomes spreads were imaged

497 using the Nikon N-SIM Super-Resolution microscope in 3D-SIM imaging mode with

498 APO TIRF 100X oil lens. The images were collected and reconstructed using the NIS-

499 Elements Imaging Software. Sections and fluorescent whole mounts were imaged using

500 the Olympus FV1000 laser scanning confocal microscope. Images were processed

501 using Fiji ImageJ software. Only linear modifications to brightness and contrast of whole

502 images were applied. Images of eggs and embryos were acquired on a dissecting  
503 microscope.

504

### 505 **Test crosses**

506 To analyze fertility, individual mutant fish were placed in a divided mating tank  
507 overnight with a single AB strain wild type fish of the opposite sex. The divider was  
508 removed soon after onset of light, and any eggs produced were collected with a  
509 strainer, rinsed thoroughly with system water, and placed in a petri dish at 30° C. At 6  
510 hours post fertilization (hpf), embryos were transferred to embryo medium (1X E3 media  
511 has final concentrations of 5 mM NaCl, 0.17 mM KCl, 0.3 mM CaCl<sub>2</sub> dihydrate, 0.33 mM  
512 MgSO<sub>4</sub> heptahydrate, 6 uM methylene blue) and categorized. Fertilized eggs were kept  
513 at 30° C and monitored at 24 and 48 hpf for morbidity and mortality.

514

515

### 516 **Acknowledgements**

517 We thank James Amatruda for the gift of the antibody to  $\gamma$ H2AX and Trent  
518 Newman, Kelly Komachi, Ivan Olaya, and Roberto Pezza for discussions.

## **References**

1. Hassold T, Hunt P. Maternal age and chromosomally abnormal pregnancies: what we know and what we wish we knew. *Curr Opin Pediatr.* 2009;21: 703–708.  
doi:10.1097/MOP.0b013e328332c6ab

2. Nagaoka SI, Hassold TJ, Hunt PA. Human aneuploidy: mechanisms and new insights into an age-old problem. *Nat Rev Genet.* 2012;13: 493–504. doi:10.1038/nrg3245
3. Gilliland WD, Scott Hawley R. Cohesin and the Maternal Age Effect. *Cell.* 2005. pp. 371–373. doi:10.1016/j.cell.2005.10.018
4. Hodges CA, Revenkova E, Jessberger R, Hassold TJ, Hunt PA. SMC1 $\beta$ -deficient female mice provide evidence that cohesins are a missing link in age-related nondisjunction. *Nat Genet.* 2005;37: 1351–1355. doi:10.1038/ng1672
5. Subramanian VV, Bickel SE. Aging Predisposes Oocytes to Meiotic Nondisjunction When the Cohesin Subunit SMC1 Is Reduced. *PLoS Genetics.* 2008. p. e1000263. doi:10.1371/journal.pgen.1000263
6. Chiang T, Duncan FE, Schindler K, Schultz RM, Lampson MA. Evidence that Weakened Centromere Cohesion Is a Leading Cause of Age-Related Aneuploidy in Oocytes. *Current Biology.* 2010. pp. 1522–1528. doi:10.1016/j.cub.2010.06.069
7. Lister LM, Kouznetsova A, Hyslop LA, Kalleas D, Pace SL, Barel JC, et al. Age-Related Meiotic Segregation Errors in Mammalian Oocytes Are Preceded by Depletion of Cohesin and Sgo2. *Current Biology.* 2010. pp. 1511–1521. doi:10.1016/j.cub.2010.08.023
8. Caburet S, Arboleda VA, Llano E, Overbeek PA, Barbero JL, Oka K, et al. Mutant cohesin in premature ovarian failure. *N Engl J Med.* 2014;370: 943–949. doi:10.1056/NEJMoa1309635
9. Michaelis C, Ciosk R, Nasmyth K. Cohesins: chromosomal proteins that prevent premature separation of sister chromatids. *Cell.* 1997;91: 35–45. doi:10.1016/s0092-8674(01)80007-6
10. Guacci V, Koshland D, Strunnikov A. A direct link between sister chromatid cohesion and chromosome condensation revealed through the analysis of MCD1 in *S. cerevisiae*. *Cell.* 1997;91: 47–57. doi:10.1016/s0092-8674(01)80008-8



11. Haering CH, Farcas A-M, Arumugam P, Metson J, Nasmyth K. The cohesin ring concatenates sister DNA molecules. *Nature*. 2008;454: 297–301.  
doi:10.1038/nature07098
12. Rankin S. Complex elaboration: making sense of meiotic cohesin dynamics. *FEBS J*. 2015;282: 2426–2443. doi:10.1111/febs.13301
13. Bickel SE, Orr-Weaver TL. Regulation of Sister-Chromatid Cohesion During *Drosophila* Meiosis. *Germ Cell Development, Division, Disruption and Death*. 1998. pp. 37–48.  
doi:10.1007/978-1-4612-2206-4\_5
14. Losada A, Hirano M, Hirano T. Identification of *Xenopus* SMC protein complexes required for sister chromatid cohesion. *Genes Dev*. 1998;12: 1986–1997.  
doi:10.1101/gad.12.13.1986
15. Klein F, Mahr P, Galova M, Buonomo SB, Michaelis C, Nairz K, et al. A central role for cohesins in sister chromatid cohesion, formation of axial elements, and recombination during yeast meiosis. *Cell*. 1999;98: 91–103. doi:10.1016/S0092-8674(00)80609-1
16. Skibbens RV. Condensins and cohesins – one of these things is not like the other! *Journal of Cell Science*. 2019. p. jcs220491. doi:10.1242/jcs.220491
17. Eijpe M, Heyting C, Gross B, Jessberger R. Association of mammalian SMC1 and SMC3 proteins with meiotic chromosomes and synaptonemal complexes. *J Cell Sci*. 2000;113 ( Pt 4): 673–682. Available: <https://www.ncbi.nlm.nih.gov/pubmed/10652260>
18. Watanabe Y, Nurse P. Cohesin Rec8 is required for reductional chromosome segregation at meiosis. *Nature*. 1999. pp. 461–464. doi:10.1038/22774
19. Buonomo SB, Clyne RK, Fuchs J, Loidl J, Uhlmann F, Nasmyth K. Disjunction of homologous chromosomes in meiosis I depends on proteolytic cleavage of the meiotic cohesin Rec8 by separin. *Cell*. 2000;103: 387–398. doi:10.1016/s0092-8674(00)00131-8

20. Kudo NR, Wassmann K, Anger M, Schuh M, Wirth KG, Xu H, et al. Resolution of chiasmata in oocytes requires separase-mediated proteolysis. *Cell*. 2006;126: 135–146. doi:10.1016/j.cell.2006.05.033
21. Severson AF, Meyer BJ. Divergent kleisin subunits of cohesin specify mechanisms to tether and release meiotic chromosomes. *Elife*. 2014;3: e03467. doi:10.7554/eLife.03467
22. DeVeaux LC, Smith GR. Region-specific activators of meiotic recombination in *Schizosaccharomyces pombe*. *Genes Dev*. 1994;8: 203–210. doi:10.1101/gad.8.2.203
23. Molnar M, Bähler J, Sipiczki M, Kohli J. The *rec8* gene of *Schizosaccharomyces pombe* is involved in linear element formation, chromosome pairing and sister-chromatid cohesion during meiosis. *Genetics*. 1995;141: 61–73. Available: <https://www.ncbi.nlm.nih.gov/pubmed/8536990>
24. Bhatt AM, Lister C, Page T, Fransz P, Findlay K, Jones GH, et al. The *DIF1* gene of *Arabidopsis* is required for meiotic chromosome segregation and belongs to the *REC8/RAD21* cohesin gene family. *Plant J*. 1999;19: 463–472. doi:10.1046/j.1365-313x.1999.00548.x
25. Pasierbek P, Jantsch M, Melcher M, Schleiffer A, Schweizer D, Loidl J. A *Caenorhabditis elegans* cohesion protein with functions in meiotic chromosome pairing and disjunction. *Genes Dev*. 2001;15: 1349–1360. doi:10.1101/gad.192701
26. Kitajima TS. *Rec8* cleavage by separase is required for meiotic nuclear divisions in fission yeast. *The EMBO Journal*. 2003. pp. 5643–5653. doi:10.1093/emboj/cdg527
27. Golubovskaya IN, Hamant O, Timofejeva L, Wang C-JR, Braun D, Meeley R, et al. Alleles of *afd1* dissect *REC8* functions during meiotic prophase I. *J Cell Sci*. 2006;119: 3306–3315. doi:10.1242/jcs.03054
28. Hong S, Joo JH, Yun H, Kleckner N, Kim KP. Recruitment of *Rec8*, *Pds5* and *Rad61/Wapl* to meiotic homolog pairing, recombination, axis formation and S-phase. *Nucleic Acids Res*. 2019;47: 11691–11708. doi:10.1093/nar/gkz903

29. Ishiguro K-I. The cohesin complex in mammalian meiosis. *Genes Cells*. 2019;24: 6–30. doi:10.1111/gtc.12652
30. Shahid S. The Rules of Attachment: REC8 Cohesin Connects Chromatin Architecture and Recombination Machinery in Meiosis. *The Plant cell*. 2020. pp. 808–809. doi:10.1105/tpc.20.00094
31. Ishiguro K-I, Kim J, Fujiyama-Nakamura S, Kato S, Watanabe Y. A new meiosis-specific cohesin complex implicated in the cohesin code for homologous pairing. *EMBO Rep*. 2011;12: 267–275. doi:10.1038/embor.2011.2
32. Herrán Y, Gutiérrez-Caballero C, Sánchez-Martín M, Hernández T, Viera A, Barbero JL, et al. The cohesin subunit RAD21L functions in meiotic synapsis and exhibits sexual dimorphism in fertility. *EMBO J*. 2011;30: 3091–3105. doi:10.1038/emboj.2011.222
33. Lee J, Hirano T. RAD21L, a novel cohesin subunit implicated in linking homologous chromosomes in mammalian meiosis. *The Journal of Cell Biology*. 2011. pp. 263–276. doi:10.1083/jcb.201008005
34. Llano E, Herrán Y, García-Tuñón I, Gutiérrez-Caballero C, de Álava E, Barbero JL, et al. Meiotic cohesin complexes are essential for the formation of the axial element in mice. *J Cell Biol*. 2012;197: 877–885. doi:10.1083/jcb.201201100
35. Ishiguro K-I, Kim J, Shibuya H, Hernández-Hernández A, Suzuki A, Fukagawa T, et al. Meiosis-specific cohesin mediates homolog recognition in mouse spermatocytes. *Genes Dev*. 2014;28: 594–607. doi:10.1101/gad.237313.113
36. Rong M, Matsuda A, Hiraoka Y, Lee J. The detailed localization of meiotic cohesin subunits, RAD21L and REC8, in mouse spermatocytes. *Reproduction Abstracts*. 2014. doi:10.1530/repabs.1.p032
37. Biswas U, Hempel K, Llano E, Pendas A, Jessberger R. Distinct Roles of Meiosis-Specific Cohesin Complexes in Mammalian Spermatogenesis. *PLoS Genet*. 2016;12: e1006389. doi:10.1371/journal.pgen.1006389

38. Saito K, Siegfried KR, Nüsslein-Volhard C, Sakai N. Isolation and cytogenetic characterization of zebrafish meiotic prophase I mutants. *Dev Dyn*. 2011;240: 1779–1792. doi:10.1002/dvdy.22661
39. Saito K, Sakai C, Kawasaki T, Sakai N. Telomere distribution pattern and synapsis initiation during spermatogenesis in zebrafish. *Dev Dyn*. 2014;243: 1448–1456. doi:10.1002/dvdy.24166
40. Blokhina YP, Nguyen AD, Draper BW, Burgess SM. The telomere bouquet is a hub where meiotic double-strand breaks, synapsis, and stable homolog juxtaposition are coordinated in the zebrafish, *Danio rerio*. *PLoS Genet*. 2019;15: e1007730. doi:10.1371/journal.pgen.1007730
41. Takemoto K, Imai Y, Saito K, Kawasaki T, Carlton PM, Ishiguro K-I, et al. Sycp2 is essential for synaptonemal complex assembly, early meiotic recombination and homologous pairing in zebrafish spermatocytes. *PLoS Genet*. 2020;16: e1008640. doi:10.1371/journal.pgen.1008640
42. Turner JMA, Mahadevaiah SK, Ellis PJI, Mitchell MJ, Burgoyne PS. Pachytene asynapsis drives meiotic sex chromosome inactivation and leads to substantial postmeiotic repression in spermatids. *Dev Cell*. 2006;10: 521–529. doi:10.1016/j.devcel.2006.02.009
43. Royo H, Polikiewicz G, Mahadevaiah SK, Prosser H, Mitchell M, Bradley A, et al. Evidence that meiotic sex chromosome inactivation is essential for male fertility. *Curr Biol*. 2010;20: 2117–2123. doi:10.1016/j.cub.2010.11.010
44. McNicoll F, Kühnel A, Biswas U, Hempel K, Whelan G, Eichele G, et al. Meiotic sex chromosome cohesion and autosomal synapsis are supported by Esco2. *Life Sci Alliance*. 2020;3. doi:10.26508/lsa.201900564
45. Gutiérrez-Caballero C, Herrán Y, Sánchez-Martín M, Suja JA, Barbero JL, Llano E, et al. Identification and molecular characterization of the mammalian  $\alpha$ -kleisin RAD21L. *Cell Cycle*. 2011;10: 1477–1487. doi:10.4161/cc.10.9.15515

46. Rong M, Matsuda A, Hiraoka Y, Jibak LEE. Meiotic cohesin subunits RAD21L and REC8 are positioned at distinct regions between lateral elements and transverse filaments in the synaptonemal complex of mouse spermatocytes. *Journal of Reproduction and Development*. 2016. pp. 623–630. doi:10.1262/jrd.2016-127
47. Siegfried KR, Nüsslein-Volhard C. Germ line control of female sex determination in zebrafish. *Developmental Biology*. 2008. pp. 277–287. doi:10.1016/j.ydbio.2008.09.025
48. Bradley KM, Breyer JP, Melville DB, Broman KW, Knapik EW, Smith JR. An SNP-Based Linkage Map for Zebrafish Reveals Sex Determination Loci. *G3*. 2011;1: 3–9. doi:10.1534/g3.111.000190
49. Anderson JL, Marí AR, Braasch I, Amores A, Hohenlohe P, Batzel P, et al. Multiple Sex-Associated Regions and a Putative Sex Chromosome in Zebrafish Revealed by RAD Mapping and Population Genomics. *PLoS ONE*. 2012. p. e40701. doi:10.1371/journal.pone.0040701
50. Liew WC, Bartfai R, Lim Z, Sreenivasan R, Siegfried KR, Orban L. Polygenic sex determination system in zebrafish. *PLoS One*. 2012;7: e34397. doi:10.1371/journal.pone.0034397
51. Kossack ME, Draper BW. Genetic regulation of sex determination and maintenance in zebrafish (*Danio rerio*). *Current Topics in Developmental Biology*. 2019. pp. 119–149. doi:10.1016/bs.ctdb.2019.02.004
52. Uchida D, Yamashita M, Kitano T, Iguchi T. Oocyte apoptosis during the transition from ovary-like tissue to testes during sex differentiation of juvenile zebrafish. *J Exp Biol*. 2002;205: 711–718. Available: <https://www.ncbi.nlm.nih.gov/pubmed/11914381>
53. Maack G, Segner H. Morphological development of the gonads in zebrafish. *J Fish Biol*. 2003;62: 895–906. doi:10.1046/j.1095-8649.2003.00074.x
54. Rodríguez-Marí A, Wilson C, Titus TA, Cañestro C, BreMiller RA, Yan Y-L, et al. Roles of *brca2* (*fancd1*) in oocyte nuclear architecture, gametogenesis, gonad tumors, and

genome stability in zebrafish. *PLoS Genet.* 2011;7: e1001357.

doi:10.1371/journal.pgen.1001357

55. Rodríguez-Marí A, Postlethwait JH. The role of Fanconi anemia/BRCA genes in zebrafish sex determination. *Methods Cell Biol.* 2011;105: 461–490. doi:10.1016/B978-0-12-381320-6.00020-5
56. Dranow DB, Tucker RP, Draper BW. Germ cells are required to maintain a stable sexual phenotype in adult zebrafish. *Dev Biol.* 2013;376: 43–50. doi:10.1016/j.ydbio.2013.01.016
57. Elkouby YM, Mullins MC. Methods for the analysis of early oogenesis in Zebrafish. *Dev Biol.* 2017;430: 310–324. doi:10.1016/j.ydbio.2016.12.014
58. Marcet-Ortega M, Pacheco S, Martínez-Marchal A, Castillo H, Flores E, Jasin M, et al. p53 and TAp63 participate in the recombination-dependent pachytene arrest in mouse spermatocytes. *PLoS Genet.* 2017;13: e1006845. doi:10.1371/journal.pgen.1006845
59. Berghmans S, Murphey RD, Wienholds E, Neuberg D, Kutok JL, Fletcher CDM, et al. tp53 mutant zebrafish develop malignant peripheral nerve sheath tumors. *Proc Natl Acad Sci U S A.* 2005;102: 407–412. doi:10.1073/pnas.0406252102
60. Dosch R, Wagner DS, Mintzer KA, Runke G, Wiemelt AP, Mullins MC. Maternal control of vertebrate development before the midblastula transition: mutants from the zebrafish I. *Dev Cell.* 2004;6: 771–780. doi:10.1016/j.devcel.2004.05.002
61. Hunt PA, Hassold TJ. Sex matters in meiosis. *Science.* 2002;296: 2181–2183. doi:10.1126/science.1071907
62. Di Giacomo M, Barchi M, Baudat F, Edelmann W, Keeney S, Jasin M. Distinct DNA-damage-dependent and -independent responses drive the loss of oocytes in recombination-defective mouse mutants. *Proc Natl Acad Sci U S A.* 2005;102: 737–742. doi:10.1073/pnas.0406212102

63. Zhang Y, Li Z, Nie Y, Ou G, Chen C, Cai S, et al. Sexually dimorphic reproductive defects in zebrafish with spo11 mutation. *Aquac Res*. 2020. doi:10.1111/are.14829
64. Selman K, Wallace RA, Sarka A, Qi X. Stages of oocyte development in the zebrafish, *Brachydanio rerio*. *J Morphol*. 1993;218: 203–224. doi:10.1002/jmor.1052180209
65. Subramanian VV, Hochwagen A. The meiotic checkpoint network: step-by-step through meiotic prophase. *Cold Spring Harb Perspect Biol*. 2014;6: a016675. doi:10.1101/cshperspect.a016675
66. Sjögren C, Nasmyth K. Sister chromatid cohesion is required for postreplicative double-strand break repair in *Saccharomyces cerevisiae*. *Curr Biol*. 2001;11: 991–995. doi:10.1016/s0960-9822(01)00271-8
67. Kim J-S, Krasieva TB, LaMorte V, Taylor AMR, Yokomori K. Specific recruitment of human cohesin to laser-induced DNA damage. *J Biol Chem*. 2002;277: 45149–45153. doi:10.1074/jbc.M209123200
68. Unal E, Arbel-Eden A, Sattler U, Shroff R, Lichten M, Haber JE, et al. DNA damage response pathway uses histone modification to assemble a double-strand break-specific cohesin domain. *Mol Cell*. 2004;16: 991–1002. doi:10.1016/j.molcel.2004.11.027
69. Chernus JM, Allen EG, Zeng Z, Hoffman ER, Hassold TJ, Feingold E, et al. A candidate gene analysis and GWAS for genes associated with maternal nondisjunction of chromosome 21. *PLoS Genet*. 2019;15: e1008414. doi:10.1371/journal.pgen.1008414
70. Minase G, Miyamoto T, Miyagawa Y, Iijima M, Ueda H, Saijo Y, et al. Single-nucleotide polymorphisms in the human RAD21L gene may be a genetic risk factor for Japanese patients with azoospermia caused by meiotic arrest and Sertoli cell-only syndrome. *Hum Fertil*. 2017;20: 217–220. Available: [https://www.tandfonline.com/doi/abs/10.1080/14647273.2017.1292004?casa\\_token=4H4JQK56hqwAAAAA:rLuyG6RsDGSCIGmvjfM063qmNelbmgNqa5MunSP5-xemksPe1AVMIPBeuNwPj-GHbnuuxrHGoKxG9w](https://www.tandfonline.com/doi/abs/10.1080/14647273.2017.1292004?casa_token=4H4JQK56hqwAAAAA:rLuyG6RsDGSCIGmvjfM063qmNelbmgNqa5MunSP5-xemksPe1AVMIPBeuNwPj-GHbnuuxrHGoKxG9w)

71. Nagabhushana A, Mishra RK. Finding clues to the riddle of sex determination in zebrafish. *J Biosci.* 2016;41: 145–155. doi:10.1007/s12038-016-9593-1
72. Leerberg DM, Sano K, Draper BW. Fibroblast growth factor signaling is required for early somatic gonad development in zebrafish. *PLoS Genet.* 2017;13: e1006993. doi:10.1371/journal.pgen.1006993
73. Blokhina YP, Olaya I, Burgess SM. Preparation of Meiotic Chromosome Spreads from Zebrafish Spermatocytes. *J Vis Exp.* 2020. doi:10.3791/60671



519 **Fig 1. Rad2111 expression and loading.** (A) Rad2111 loading during prophase I of  
520 meiosis in spermatocyte nuclear surface spreads. Rad2111 (magenta) loads onto  
521 chromosome axes simultaneously with Sycp3 (green) and is also dispersed as foci  
522 throughout the spread in leptotene. In early zygotene, Sycp1 (cyan) lines start near the  
523 telomeres and synapsis extends inward through late zygotene. The merged images are  
524 Rad2111 and Sycp3 channels only. Mag images are magnifications from the Merge  
525 panels; the regions magnified are indicated by white boxes. Panel series a-p scale bar =  
526 5 um. Mag panel series q-t scale bar = 2 um. (B) Rad2111 loading during prophase I of  
527 meiosis in oocyte nuclear surface spreads. Panels a-e are arranged similarly to the  
528 corresponding panels of part (A).

529

530 **Fig 2. *rad2111*<sup>-/-</sup> mutants are predominantly male due to late sex reversion.** (A)  
531 TALEN generated 17-bp deletion leads to a frameshift mutation resulting in a truncated  
532 27 amino acid (aa) Rad2111 protein with the conserved Rec8/Rad21-like family domains  
533 (1-100 aa and 495-543 aa) disrupted or deleted. Rec8/Rad21-like domains (purple  
534 boxes); altered amino acid sequence (red box). The ATG translational start site is  
535 located at the 4th-6th nt from the end. (B) Spermatocyte nuclear spreads stained for  
536 telomeres (cyan), Sycp3 (green), and Rad2111 (magenta). Rad2111 forms lines of foci  
537 along the Sycp3 axis in *rad2111*<sup>+/-</sup> spermatocytes. In the *rad2111* mutant, no lines of  
538 Rad2111 foci are seen. The *rad2111* mutant spermatocytes can form axes and pair  
539 homologs. Scale bar = 5 um. (C) Sexed offspring of a *rad2111*<sup>+/-</sup> incross show a  
540 depletion of females in *rad2111*<sup>-/-</sup> fish. Data pooled from multiple crosses. (D) Sections of  
541 gonads prepared from 35-36 dpf *rad2111*<sup>+/+</sup> and *rad2111*<sup>+/-</sup> (labelled *rad2111*<sup>+</sup>) and

542 *rad2111*<sup>-/-</sup> fish and stained for DNA (gray) and Ddx4 (also known as Vasa; green). At 35-  
543 36 dpf, oocytes are present in 10/12 *rad2111*<sup>+/-</sup> and 6/11 *rad2111*<sup>-/-</sup> samples. Scale bar =  
544 30 um. (E) Whole mounts of gonads from 40 and 45 dpf are stained for DNA (gray) and  
545 Ddx4 (green). At 40 dpf, oocytes are present in 11/21 *rad2111*<sup>+/+</sup> and 1/19 *rad2111*<sup>-/-</sup>  
546 samples. At 45 dpf, oocytes are present in 7/9 *rad2111*<sup>+/+</sup> and 1/10 *rad2111*<sup>-/-</sup> samples.  
547 Scale bar = 30 um. Fisher's exact test used for all statistical analysis. (+ ; oocytes  
548 present), (- ; oocytes absent), ns = p>0.05, \*\* = p<0.01, \*\*\*\* = p<0.0001.

549

550 **Fig 3. Rad2111 is dispensable for male fertility.** (A/B) Data resulting from test crosses  
551 between *rad2111*<sup>-/-</sup> males and wild-type females to assess fertility and reproductive  
552 phenotype. *rad2111*<sup>+/+</sup> male tank mates were used as controls. No significant difference  
553 in the number of eggs the males caused the females to release, the composition of the  
554 resulting clutch at 6 hpf, or the survival of the embryos through 48 hpf. Data pooled from  
555 14 crosses over 5 weeks using the same pool of 14 *rad2111*<sup>-/-</sup> males, 12/14 of which  
556 crossed successfully at least once. Unpaired, two-tailed student t-test used for statistical  
557 analysis, ns = p>0.05. (C) Whole mount adult testes stained for DNA (gray) and Ddx4  
558 (green) showing a phenotypic range of gonad morphology in *rad2111*<sup>-/-</sup> males. All  
559 samples except #5 displayed large clusters of mature sperm. Images marked as A and  
560 B were taken from the same sample to show variation within a single gonad. Wild-type  
561 tank mates used as controls. Scale bar = 30 um. (D) Testes sections stained with a  
562 PNA telomere probe (Tel; magenta), an antibody to  $\gamma$ H2AX (green), and DAPI (blue),  
563 showing that telomere clustering and DSB localization ( $\gamma$ H2AX) are normal in the  
564 *rad2111* mutant. Scale bar = 5 um.

565

566 **Fig 4. *tp53* knockout restores females to *rad2111* mutant population, but *rad2111***  
567 ***tp53* double mutant females produce poor quality eggs and malformed embryos.**

568 (A) Sex ratios of all genotypes resulting from a *rad2111*<sup>+/-</sup> *tp53*<sup>+/-</sup> incross. Data pooled  
569 from 3 crosses. Errors bars are 95% confidence intervals. Fisher's exact test used for  
570 statistical analysis. (B) Data resulting from test crosses between *rad2111*<sup>-/-</sup> *tp53*<sup>-/-</sup>  
571 females and wildtype males to assess fertility and reproductive phenotype. *rad2111*<sup>+/+</sup>  
572 *tp53*<sup>-/-</sup> female tank mates used as controls. No significant difference in the number of  
573 eggs the females released. *rad2111*<sup>-/-</sup> *tp53*<sup>-/-</sup> double mutant females release a  
574 significantly greater percentage of eggs that fail to be fertilized or display premature  
575 decomposition. (C) Representative images of clutches from double mutant and control  
576 females at 6 hpf showing lower overall quality of eggs released from double mutant  
577 females. (D) Images i-iii show examples of eggs described in the text at 6 hpf. Panel i  
578 shows a normal egg (left) and a tiny egg (right). Panel ii shows prematurely  
579 decomposing eggs and panel iii shows opaque eggs. All images are the same  
580 magnification. (E) Of normal embryos at 6 hpf, 32.4% are dead or malformed at 24 hpf  
581 and 38.7% by 48 hpf. Unpaired, two-tailed student t-test used for statistical analysis. (F)  
582 Representative images showing the range of malformations seen in developing  
583 embryos from *rad2111*<sup>-/-</sup> *tp53*<sup>-/-</sup> females at 24 and 48 hpf. ns = p>0.05, \* = p<0.05, \*\* =  
584 p<0.01, \*\*\* = p<0.001.

585

586 **Fig 5. *spo11 rad2111* double mutants are infertile males.** (A) Sex ratios of all  
587 genotypes resulting from a *rad2111*<sup>+/-</sup> *spo11*<sup>+/-</sup> incross. Mostly males seen in all 3

588 genotypes without Spo11. Data pooled from 6 crosses. Errors bars are 95% confidence  
589 intervals. ns =  $p > 0.05$ . (B) Whole mount testes stained for DNA (gray) and Ddx4  
590 (green). WT and *rad2111<sup>-/-</sup> spo11<sup>+/+</sup>* samples display clusters of mature sperm, while  
591 *rad2111<sup>+/+</sup> spo11<sup>-/-</sup>* and *rad2111<sup>-/-</sup> spo11<sup>-/-</sup>* samples do not. Scale bar = 30  $\mu$ m.

592

593 **S1 Fig. Alignment of zebrafish Rad2111, Rec8a, and Rec8b proteins.** Alignment of  
594 zebrafish Rad2111 (ENSDARP00000074083), Rec8a (ENSDARP00000116796), and  
595 Rec8b (ENSDARP00000091417) using the Snappene (v 5.1.4.1) Clustal Omega tool.  
596 Yellow shading indicates amino acids of Rec8a and Rec8b that match the Rad2111  
597 references sequences. The consensus sequence threshold has set at  $> 50\%$ . Amino  
598 acids 329-516 (highlighted) were expressed to create the Rad2111 antibody in Guinea  
599 pigs.

600

601 **S1 Table. Antibodies used in this study**

602 **S1 File. Master data sheet**

603

604

605

606

Figure 1

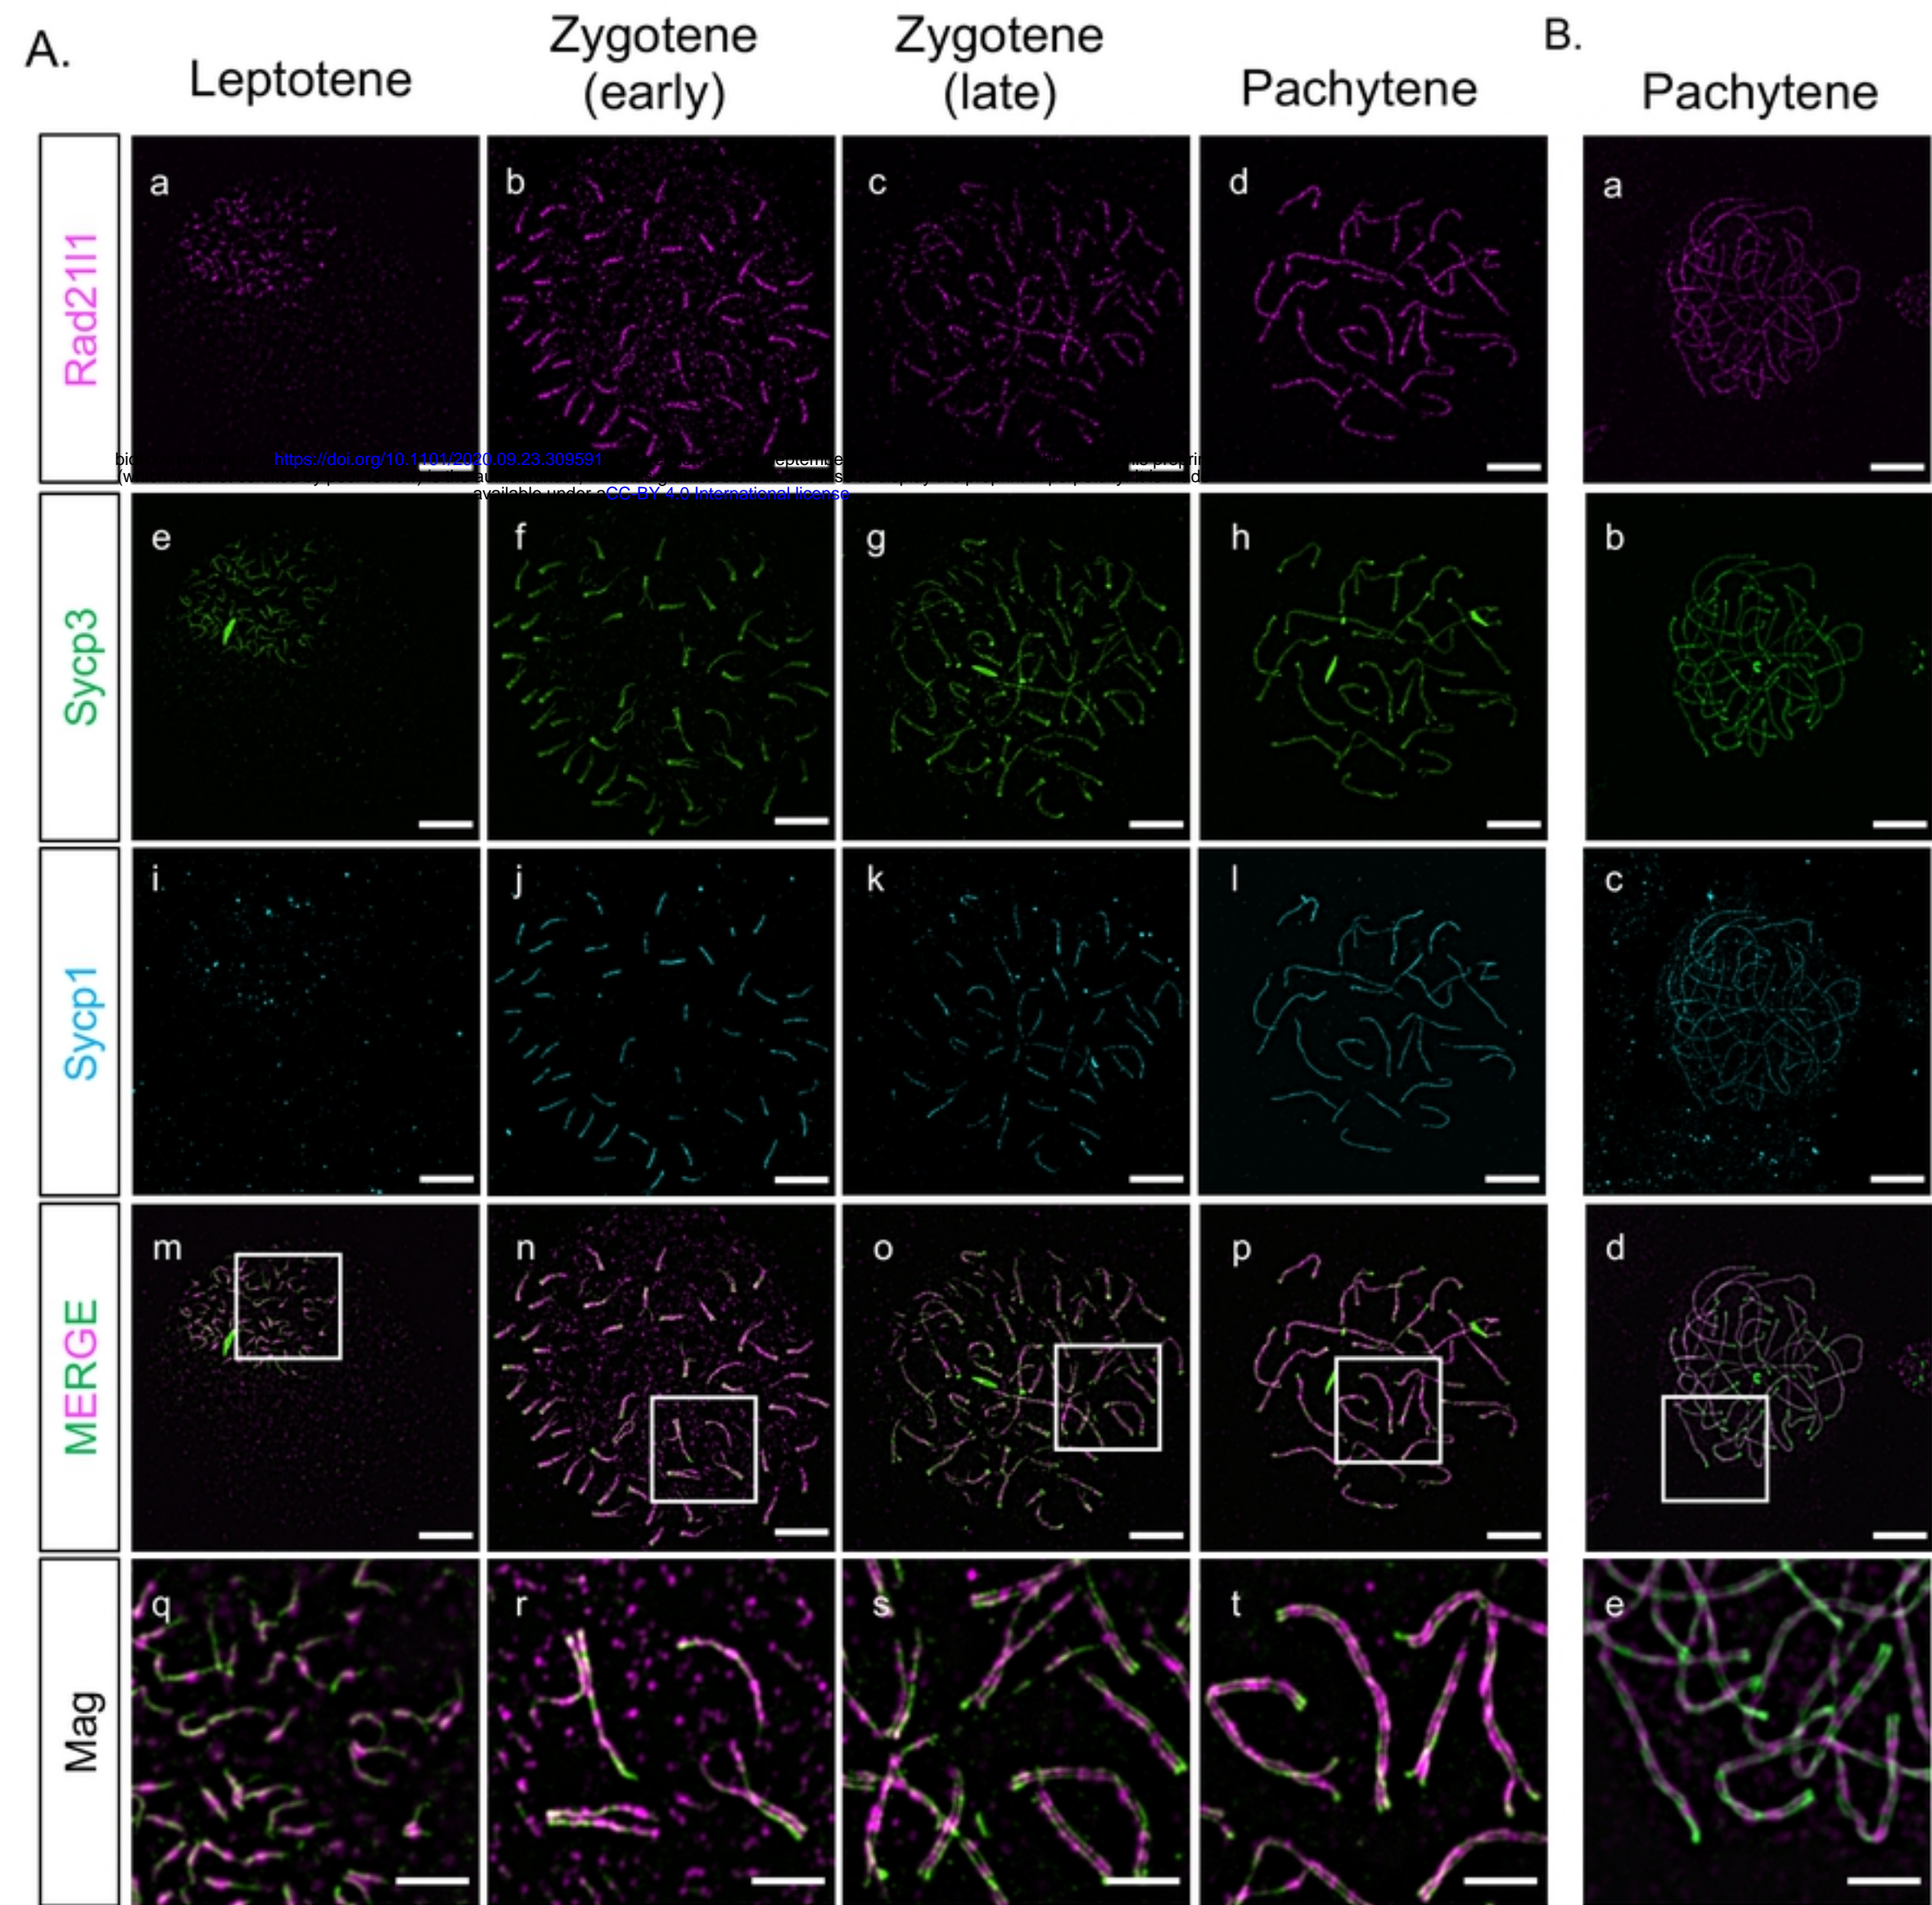

# Figure 2

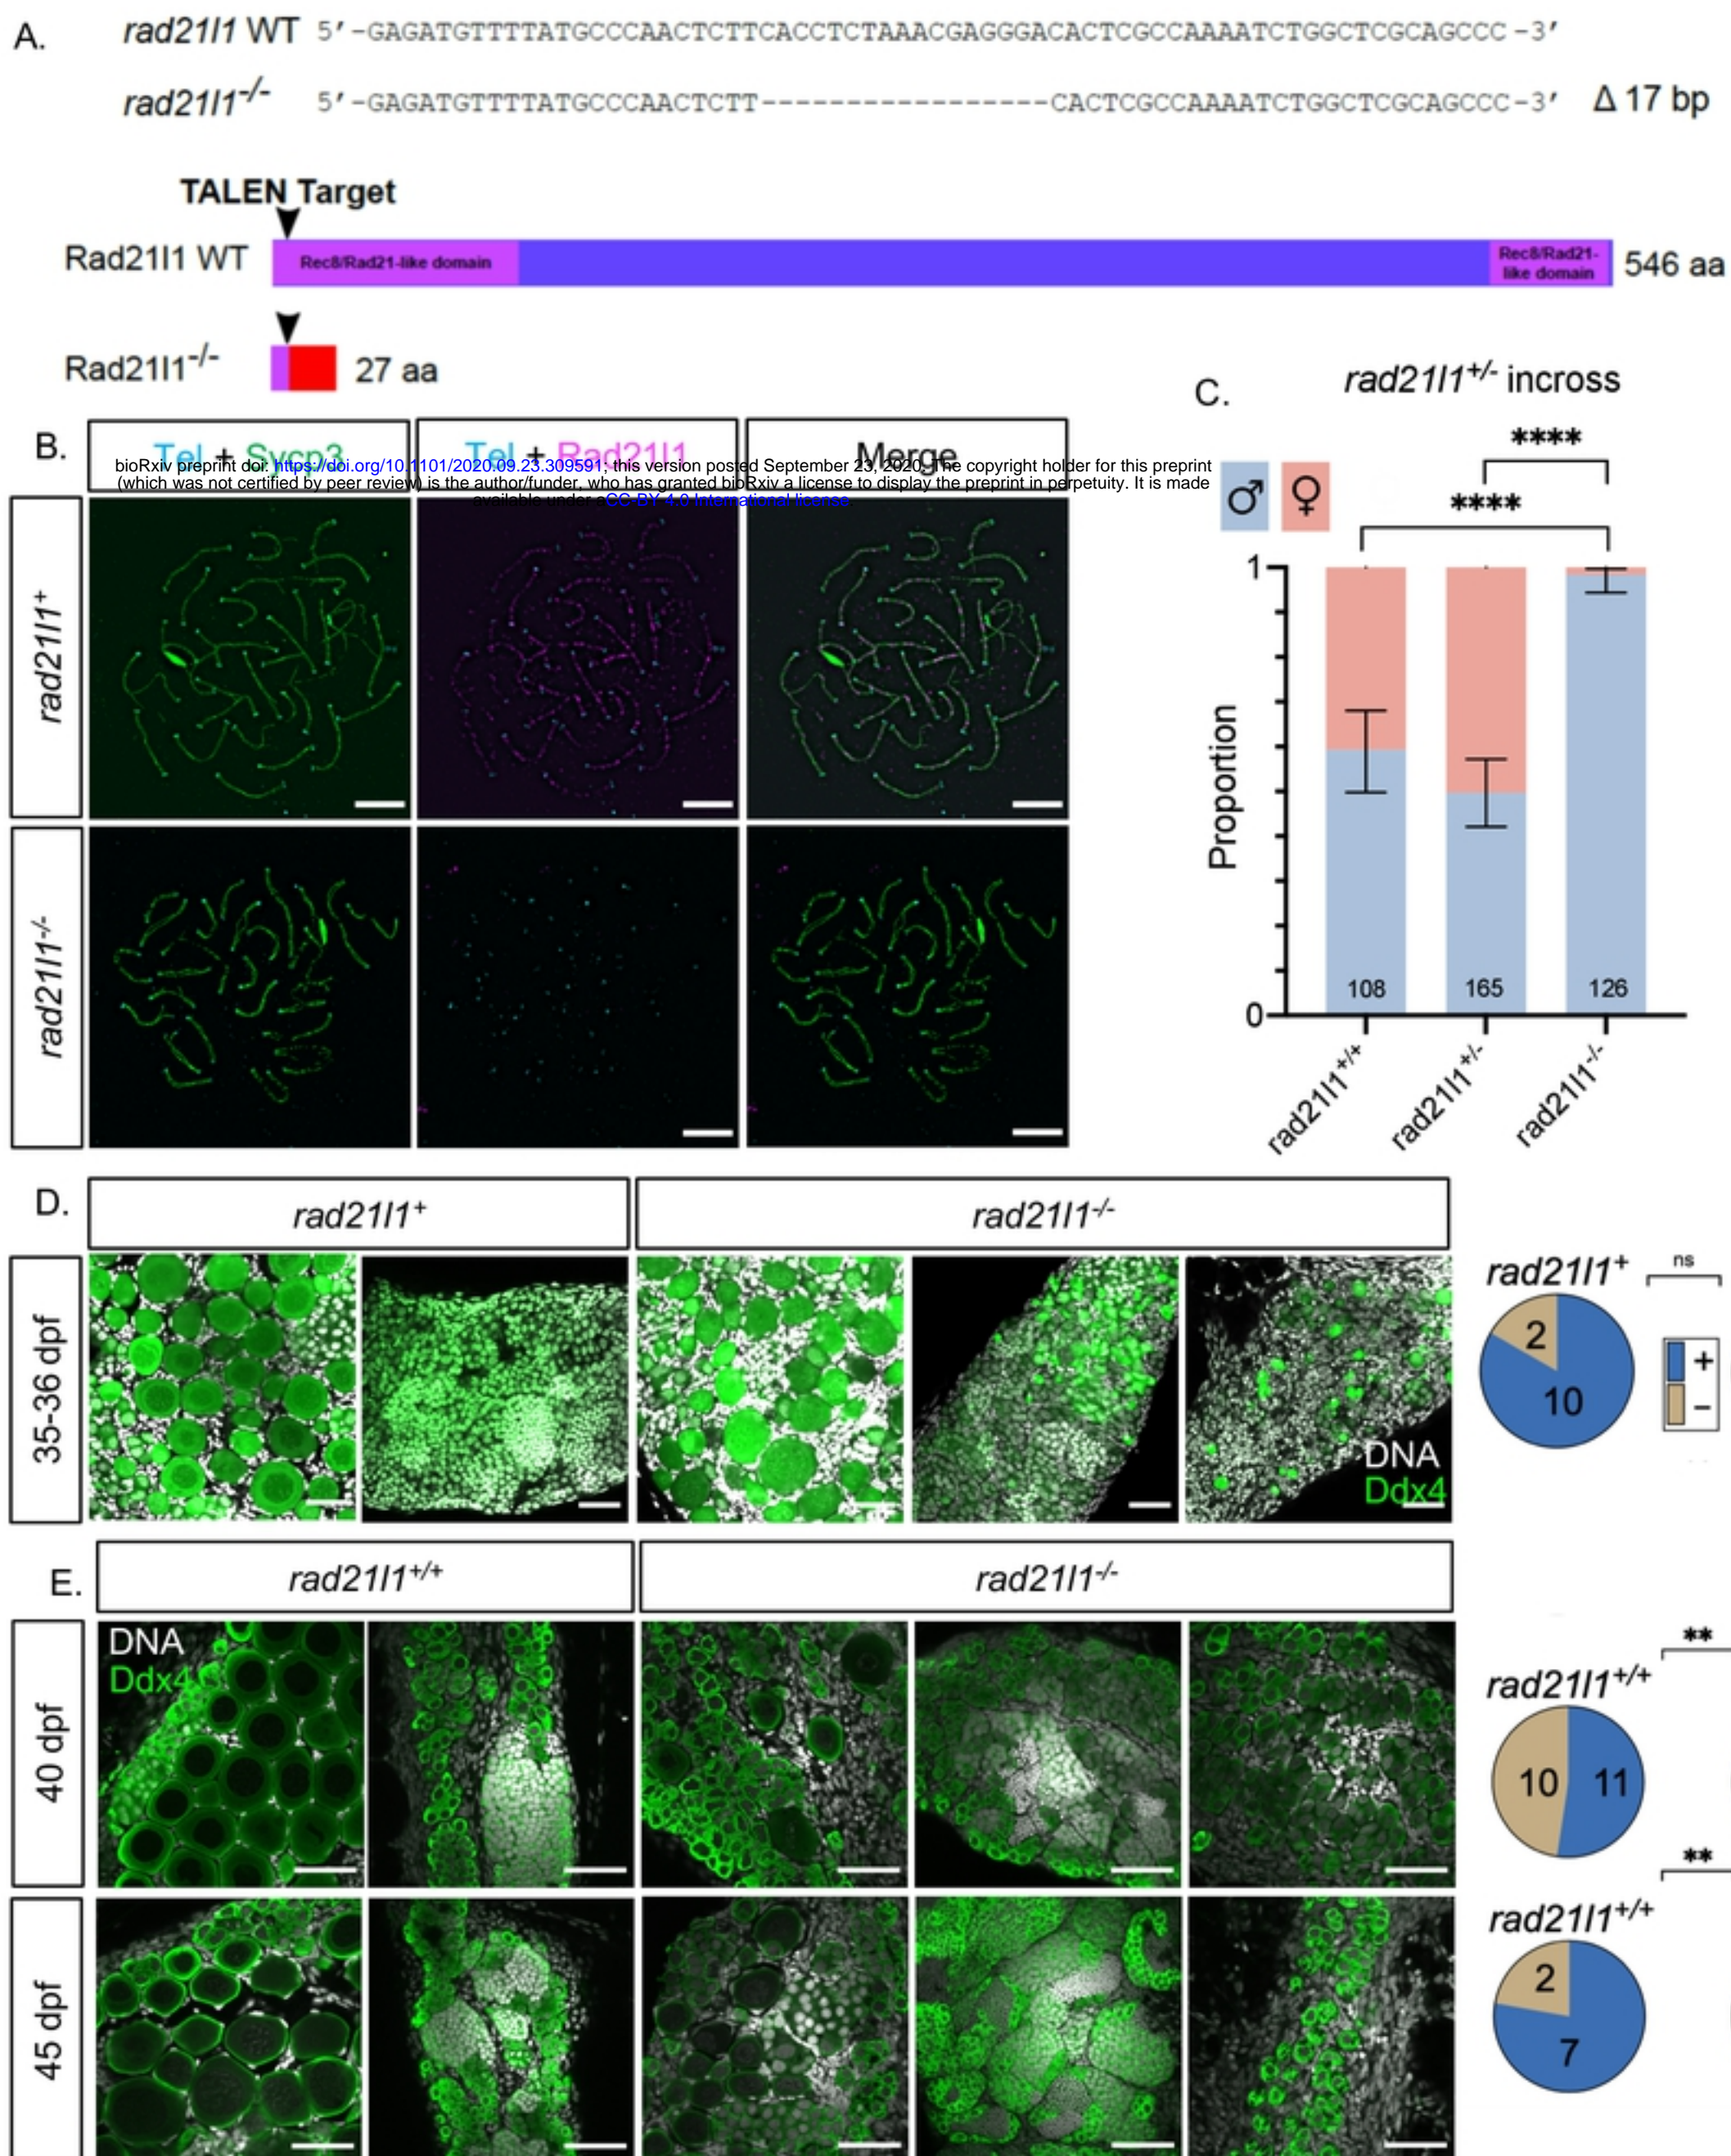

bioRxiv preprint doi: <https://doi.org/10.1101/2020.09.23.309591>; this version posted September 23, 2020. The copyright holder for this preprint (which was not certified by peer review) is the author/funder, who has granted bioRxiv a license to display the preprint in perpetuity. It is made available under aCC-BY 4.0 International license.

# Figure 3

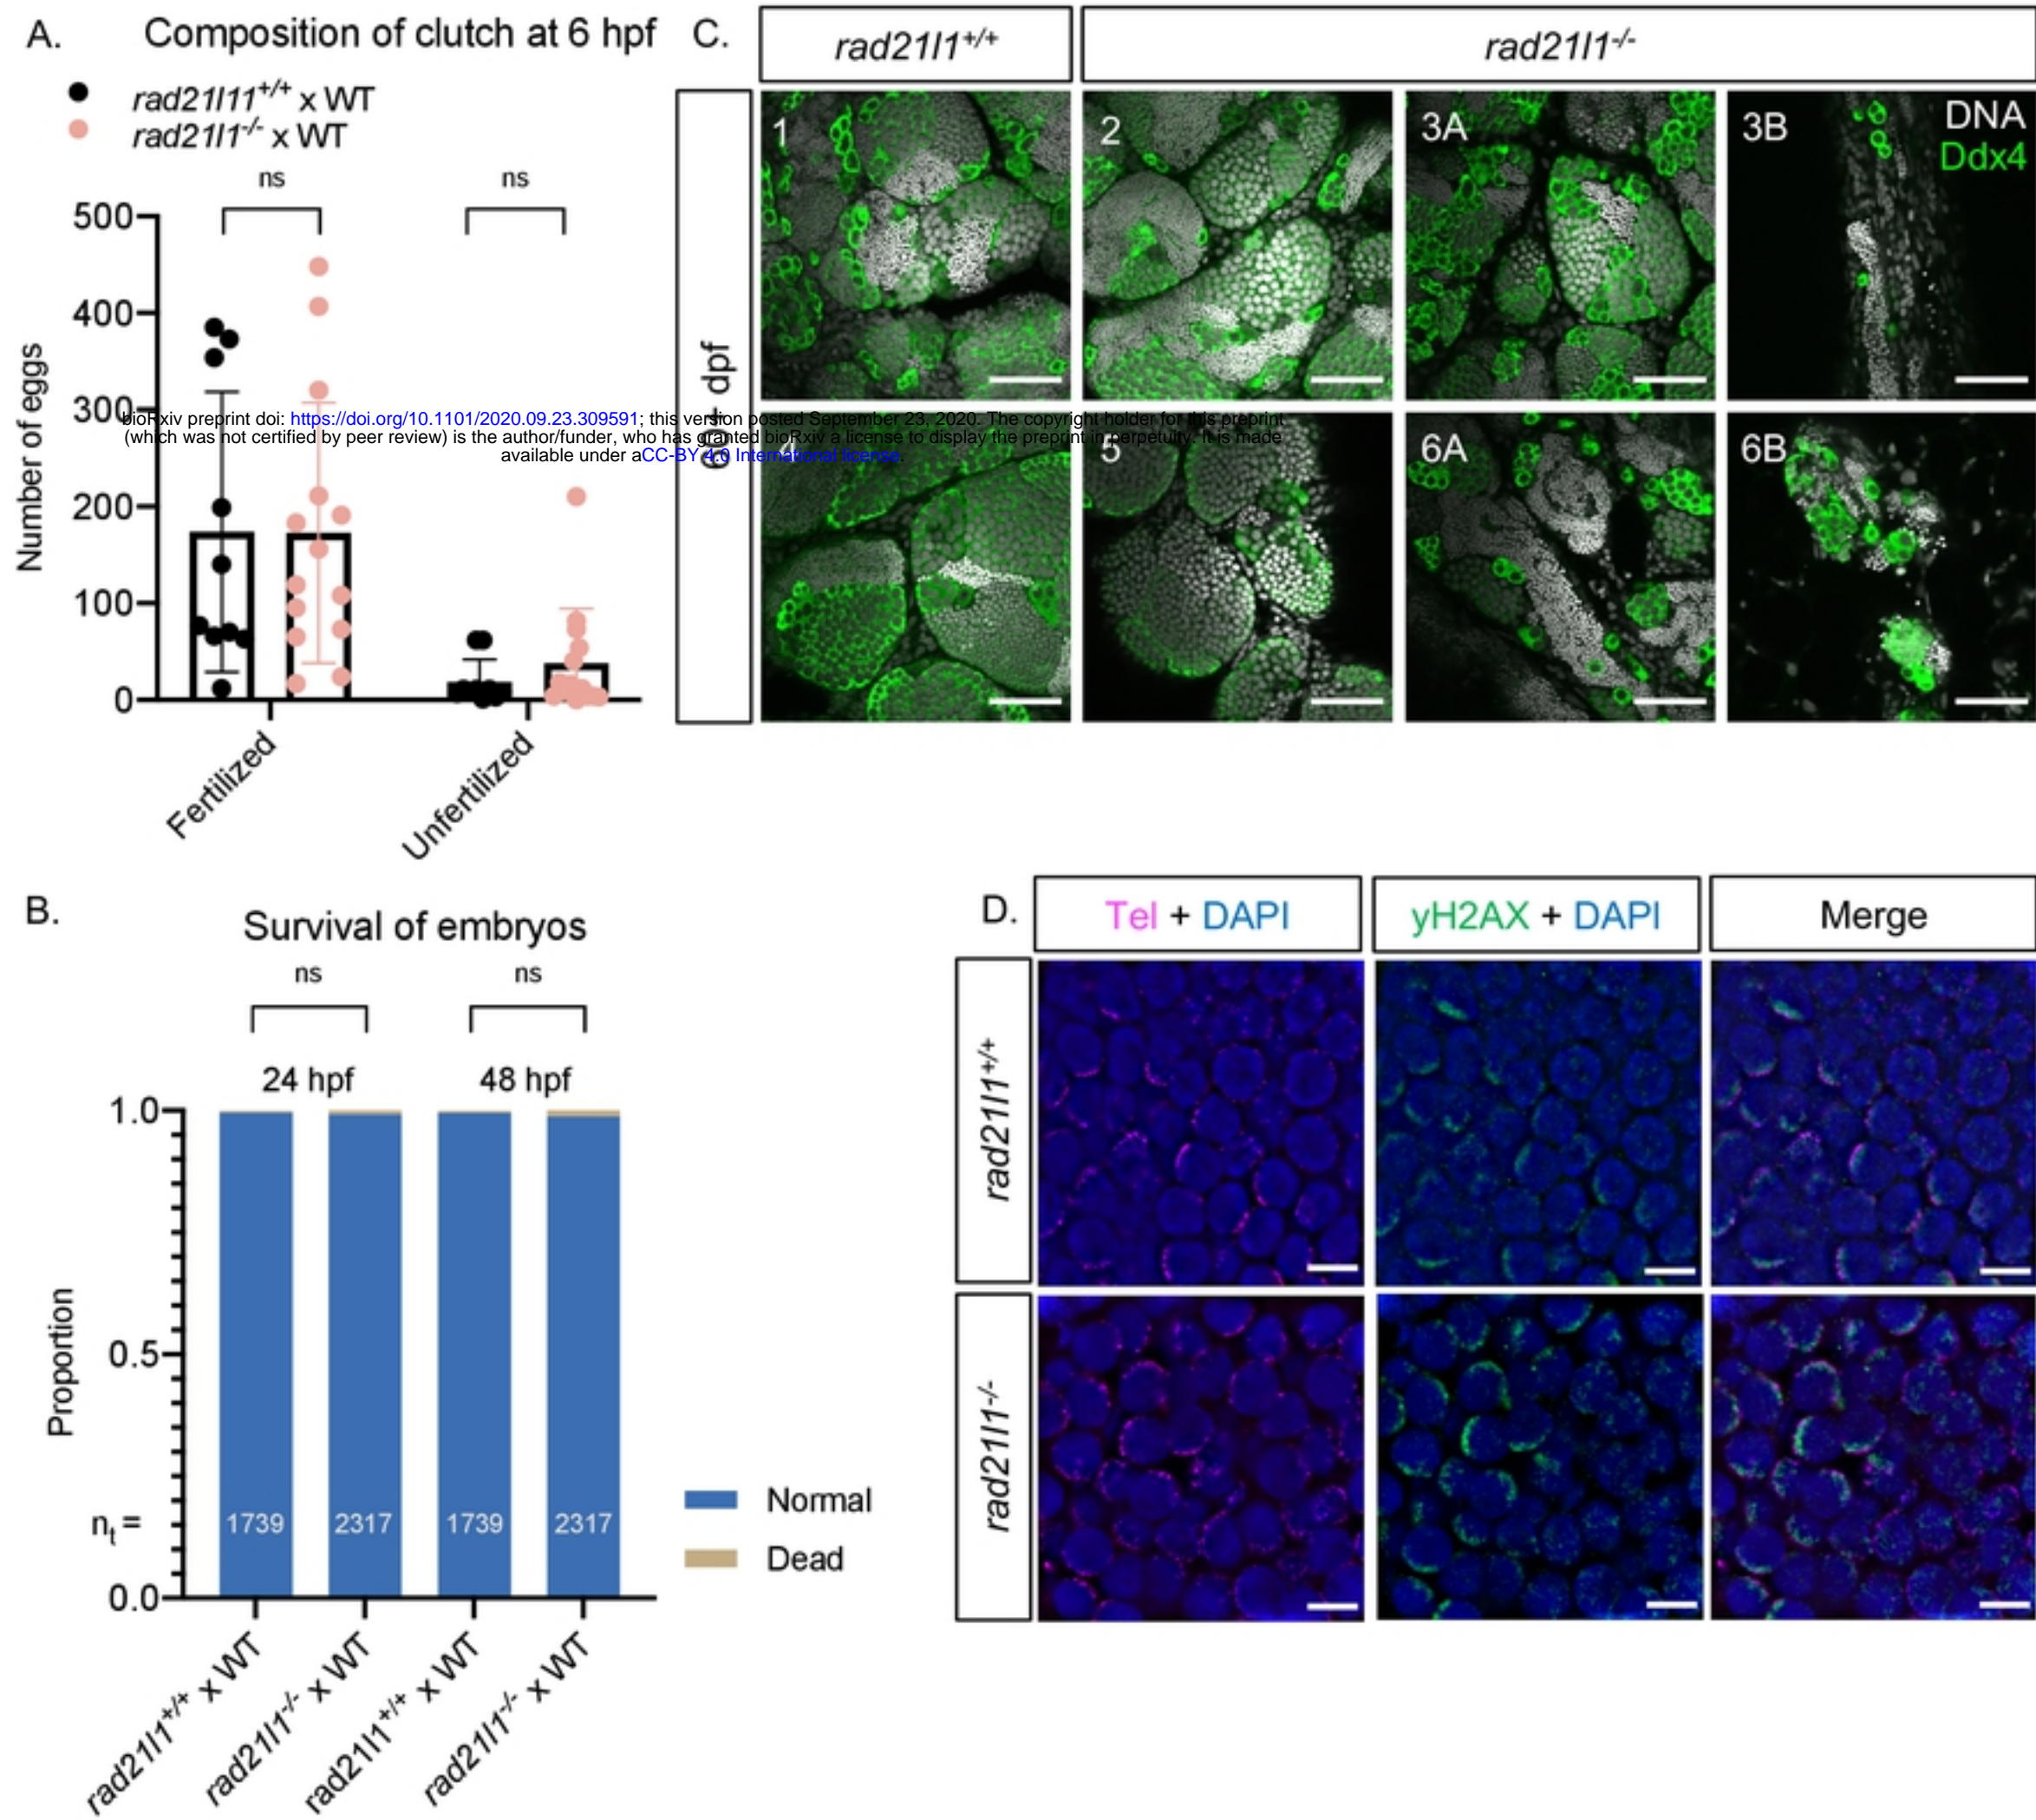

# Figure 4

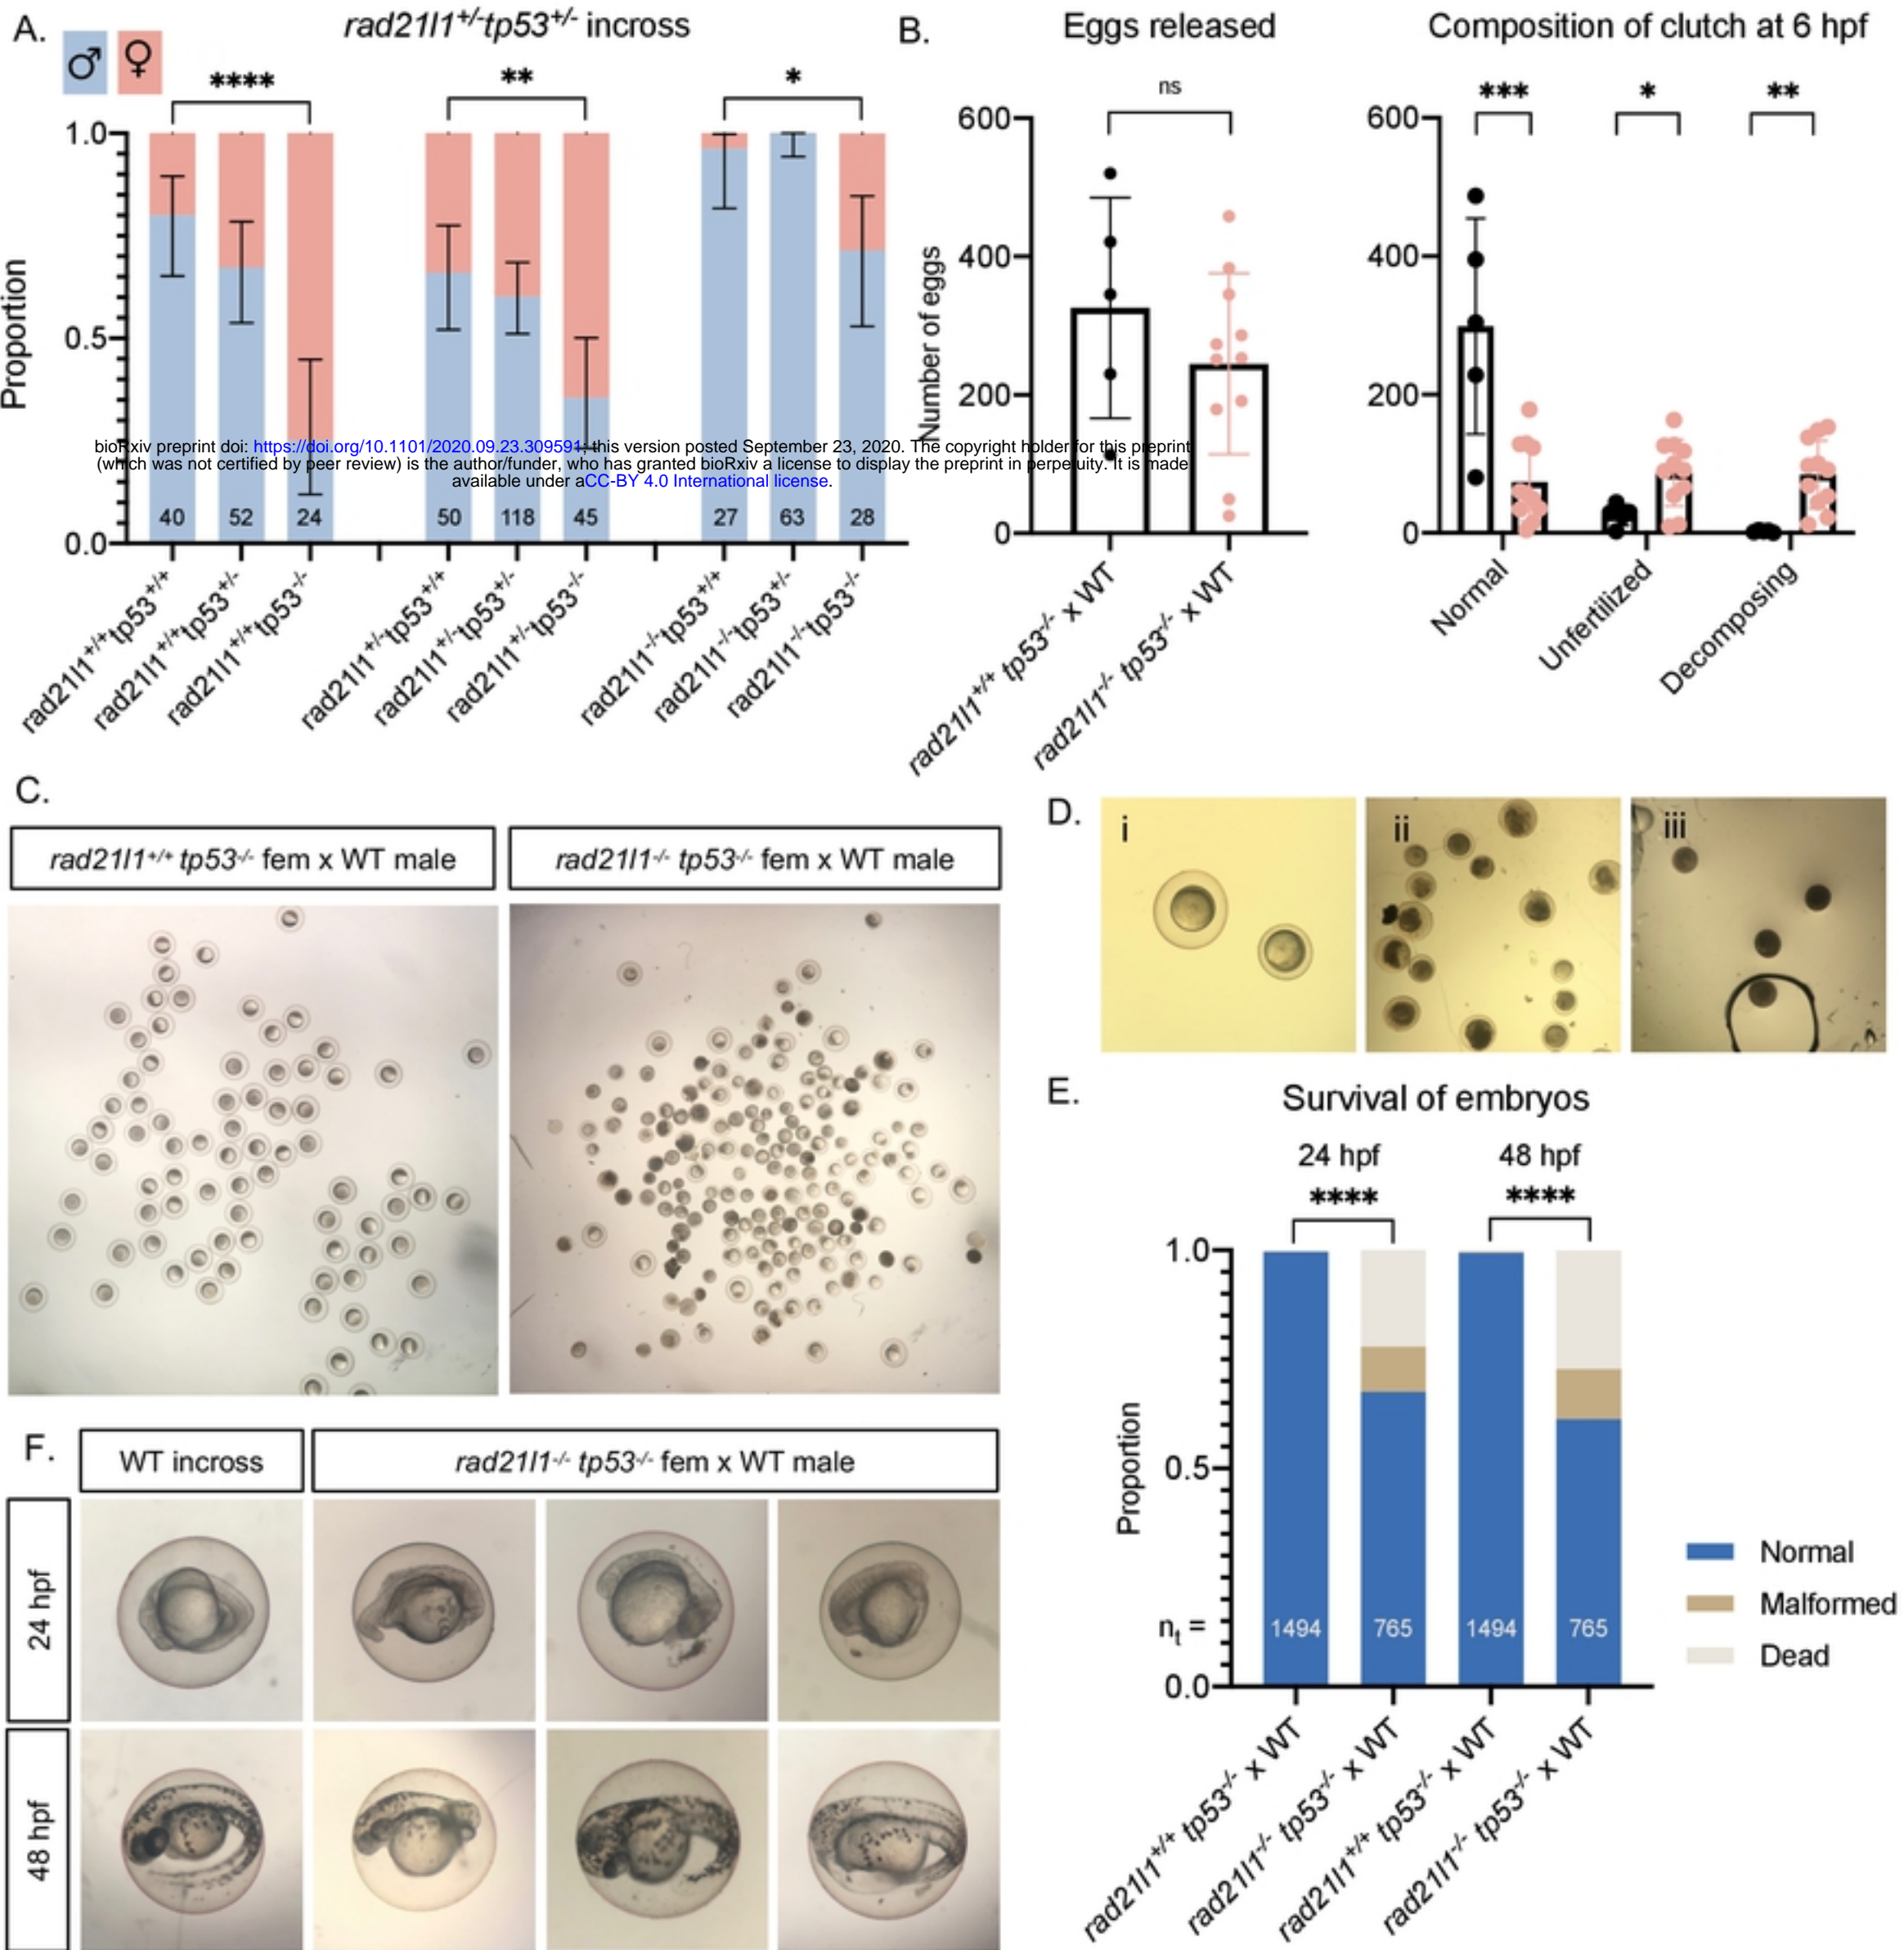

bioRxiv preprint doi: <https://doi.org/10.1101/2020.09.23.309591>; this version posted September 23, 2020. The copyright holder for this preprint (which was not certified by peer review) is the author/funder, who has granted bioRxiv a license to display the preprint in perpetuity. It is made available under aCC-BY 4.0 International license.



# Figure 5

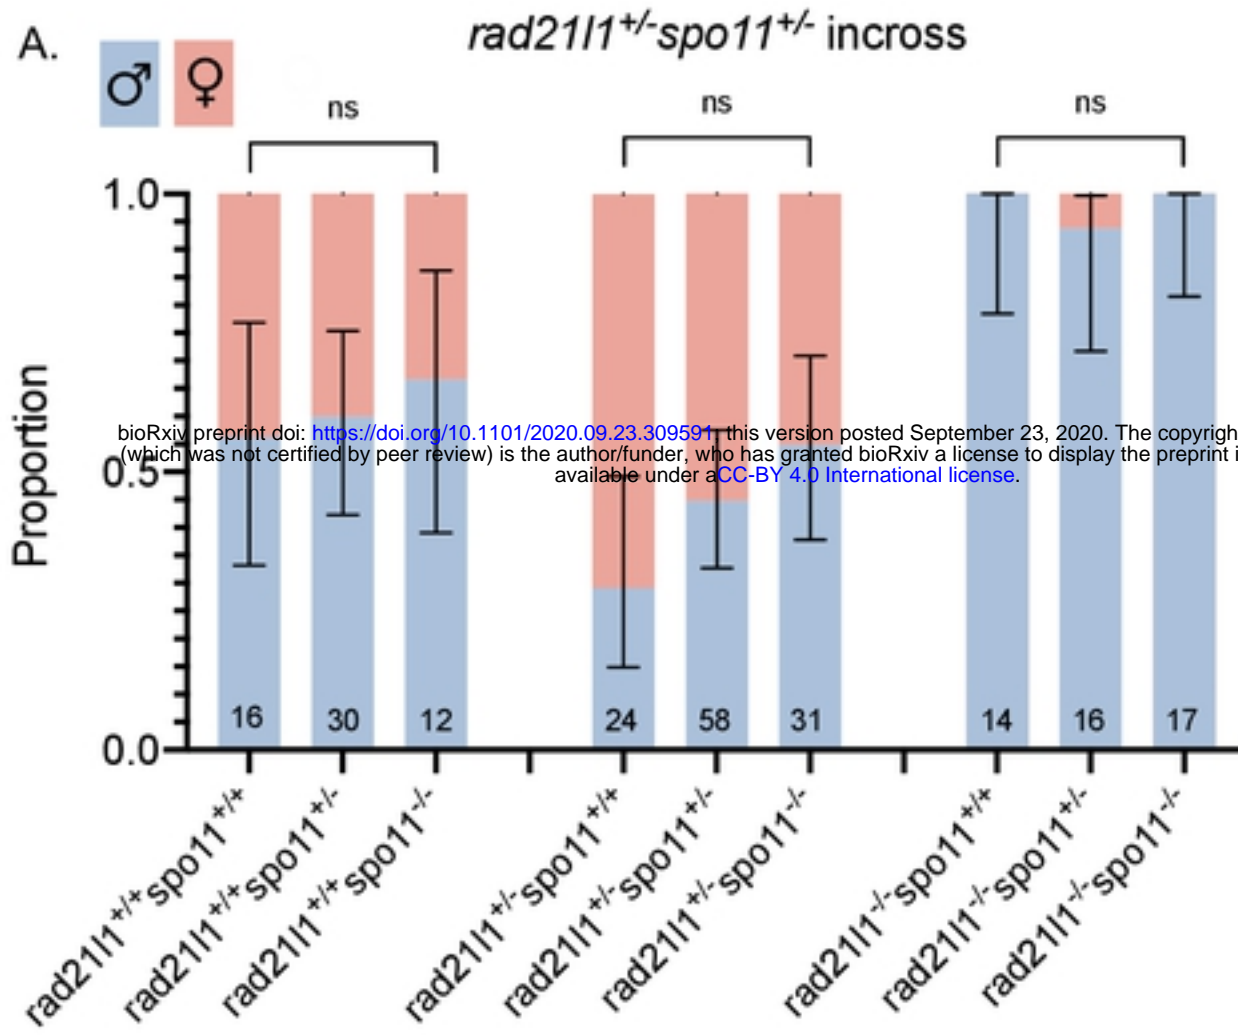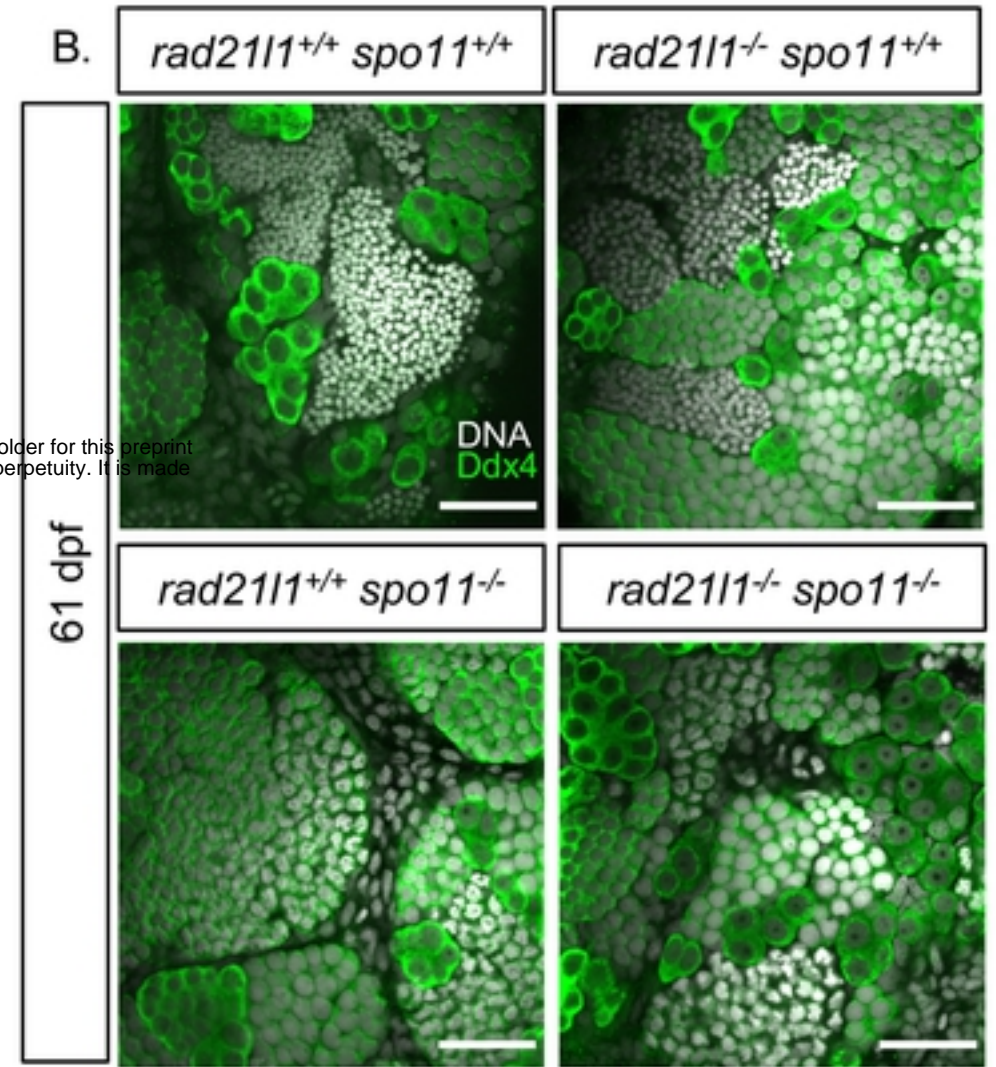

Source: http://biorxiv.org/content/10.1101/2020.09.23.309591v1.full.pdf
